# Supplementary material
Source: publisher figshare collection journal article supplement (https://acs.figshare.com/ndownloader/files/4548730)
Supplement: Supplementary file 1 [file 4548730]

## Supporting Information

### A Tetrachloro Polyketide Hexahydro-1*H*-isoindolone, Muironolide A, from the Marine Sponge *Phorbas* sp. Natural Products at the Nanomole-Scale

Doralyn S. Dalisay,<sup>†</sup> Brandon I. Morinaka,<sup>†</sup> Colin K. Skepper<sup>†</sup> and Tadeusz F. Molinski<sup>\*,†,§</sup>

Department of Chemistry and Biochemistry, and Skaggs School of Pharmacy and Pharmaceutical Sciences, University of California San Diego, 9500 Gilman Drive MC0358, La Jolla, CA, 92093

[tmolinski@ucsd.edu](mailto:tmolinski@ucsd.edu)

| Page    | Contents                                                                                                                                      |
|---------|-----------------------------------------------------------------------------------------------------------------------------------------------|
| S1      | General Procedures and isolation of <b>1</b>                                                                                                  |
| S2      | Synthesis of (±)-1,1,1-trichloro-4-phenylbutan-2-yl hexanoate ( <b>4</b> ).                                                                   |
| S2-S4   | Isolation of <b>1</b> ; preparation of methyl (2-chloro-1-cyclopropyl)-3-hydroxypropanoates <b>7a</b> , <b>7b</b> , <b>7c</b> and <b>7d</b> . |
| S5      | S- and R- Mosher's esters of major isomer, <b>7a</b> .                                                                                        |
| S6      | Hydrolysis of <b>1</b> : Naphthone Derivative and LCMS Analysis of Naphthone esters.                                                          |
| S7-S8   | ESI-FT-ICR HRMS (+ve ion mode) of <b>1</b> and isotope peak simulation                                                                        |
| S9-S10  | ESI-FT-ICR HRMS (–ve ion mode) of <b>1</b> and isotope peak simulation                                                                        |
| S11     | CD spectrum of <b>1</b>                                                                                                                       |
| S12     | Table S1. <sup>1</sup> H and <sup>13</sup> C NMR data for <b>1</b>                                                                            |
| S13     | <sup>1</sup> H NMR spectrum of <b>1</b> (600 MHz, CDCl <sub>3</sub> )                                                                         |
| S14     | COSY spectrum of <b>1</b> (600 MHz, CDCl <sub>3</sub> )                                                                                       |
| S15     | HMBC spectrum of <b>1</b> (600 MHz, CDCl <sub>3</sub> )                                                                                       |
| S16–S19 | HMBC spectrum of <b>1</b> (600 MHz, CDCl <sub>3</sub> ), expansions                                                                           |
| S20     | <sup>1</sup> H-coupled HSQC spectrum of <b>1</b> (600 MHz, CDCl <sub>3</sub> ).                                                               |
| S21     | <sup>1</sup> H-coupled HSQC spectrum of <b>1</b> (600 MHz, CDCl <sub>3</sub> ), expansion.                                                    |
| S22     | NOESY spectrum of <b>1</b> (600 MHz, CDCl <sub>3</sub> , <i>t</i> <sub>m</sub> = 400 ms).                                                     |
| S23     | HETLOC spectrum of <b>1</b> (600 MHz, CDCl <sub>3</sub> ).                                                                                    |
| S24     | Chiral LC-MS chromatograms of <b>7a</b> , <b>7b</b> , <b>7c</b> and <b>7d</b> .                                                               |
| S25     | Chiral LC-MS of 2-naphthone esters of hydrolyzed <b>1</b> and 2-naphthone esters <b>7b</b> and <b>7d</b> .                                    |
| S26     | CD spectra of <b>7a</b> , <b>7b</b> , <b>7c</b> and <b>7d</b> .                                                                               |
| S27     | <sup>1</sup> H NMR spectra of ( <i>S</i> )- and ( <i>R</i> )-MTPA ester of <b>7a</b> . (600 MHz, CDCl <sub>3</sub> ).                         |

<sup>†</sup> Department of Chemistry and Biochemistry

<sup>§</sup> SSPPS

**General Procedures.** HPLC grade solvent used for purification of sub-micromole samples was redistilled from glass. CD spectra were recorded on a Jasco J810 spectropolarimeter in 0.1 cm quartz cells at 23 °C unless otherwise stated. UV-Vis spectra were recorded in a dual beam Jasco V630 spectrometer in 0.1 cm quartz cells.  $^1\text{H}$  and  $^{13}\text{C}$  NMR spectra were recorded in  $\text{CDCl}_3$  (99.8/% D) using either a Varian Mercury-400 (400 MHz), Varian Unity-500 (500 MHz), Bruker DMX-600 (600 MHz) equipped with a 1.7-mm  $\{^{13}\text{C}\}^1\text{H}$  cryoprobe (Bruker 1.7 mm CPTCI probe). NMR spectra were measured in  $\text{CDCl}_3$  and referenced to residual solvent signals ( $^1\text{H}$ ,  $\delta$  7.26 ppm;  $^{13}\text{C}$ ,  $\delta$  77.16 ppm). IR spectra were recorded using attenuated total reflectance (ATR, 3 mm ZnSe plate) with a Jasco 4100 FTIR on samples deposited as thin films. LR LCMS was carried out on a ThermoFisher Accela UPLC coupled to an MSQ single quadrupole mass spectrometer operating in positive ion mode, unless otherwise stated. HRMS measurements were measured at the Scripps Research Institute (TOF-MS or ICR-FTMS) mass spectrometry facility. Semi-preparative HPLC was carried out on a Varian SD200 system equipped with a dual-pump and UV-1 detector (variable  $\lambda$ 's) under specified conditions.

**Isolation of 1.** The sponge *Phorbas* sp. (sample ID: 93-054) was collected at –10 m by scuba near Muiron Island, Western Australia in 1993. The single specimen was immediately frozen and stored at –20 °C until extraction (~2 months). The  $\text{CCl}_4$ -soluble fraction (93-054-B-1, 350 mg) of the MeOH extract<sup>1</sup> was separated by flash chromatography (silica cartridge, Analogix RS-12, 12 g, 2 cm x 7.5 cm) and elution by step-gradient of solvent (0-100% EtOAc in hexane) to yield seven fractions. Fraction 5 (93-054-B1-5, 12.5 mg) was further purified twice by reversed phase HPLC (Phenylhexyl column, 250  $\times$  10 mm, 1:9  $\text{H}_2\text{O}$ -MeOH, followed by Phenylhexyl column, 250  $\times$  4.6 mm, 2:3  $\text{H}_2\text{O}$ - $\text{CH}_3\text{CN}$ ) to yield pure **1** ( $t_{\text{R}}$  = 34 min), 90  $\mu\text{g}$  (yield =  $4.1 \times 10^{-5}$  % dry weight of sponge). The yield was calculated using NMR quantitation by solvent  $^{13}\text{C}$ -satellites (QSCS).<sup>2</sup>

---

(1) Searle, P. A.; Molinski, T. F. *J. Am. Chem. Soc.* **1995**, *117*, 8126.

(2) Dalisay, D. S.; Molinski, T. F. *J. Nat. Prod.* **2009**, *11*, 1967.

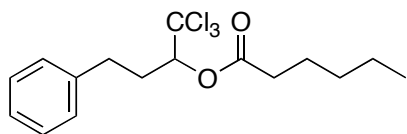

**(±)-1,1,1-trichloro-4-phenylbutan-2-yl hexanoate, 4.** A solution of (±)-1,1,1-trichloro-4-phenylbutan-2-ol (130 mg, 0.516 mmol, prepared from hydrocinnamaldehyde,  $\text{Cl}_3\text{COOH}$  and  $\text{Cl}_3\text{COONa}$  in  $\text{DMF}^3$ ) in dry  $\text{CH}_2\text{Cl}_2$  (5 mL) was treated with DMAP (63 mg, 0.516

mmol) and DCC (106.7 mg, 0.516 mmol) and the mixture stirred for 5 min. Hexanoic acid (72.2 mg, 0.621 mmol) was added and the mixture stirred at r.t. under  $\text{N}_2$  until TLC indicated completion of the reaction (3 h). The solvent was removed under reduced pressure and the solid residue was dissolved in EtOAc (10 mL) and chilled at 0 °C for 10 min whereupon a colorless solid precipitated. The solid was removed by filtration and the supernatant washed with sat.  $\text{NH}_4\text{Cl}$  ( $3 \times 6$  mL) and sat.  $\text{NaCl}$  ( $3 \times 4$  mL). The organic layer was passed through a short column of anhydrous  $\text{Na}_2\text{SO}_4$  and the filtrate was concentrated under reduced pressure to give a crude product which was purified by flash chromatography (silica, 2:3  $\text{CH}_2\text{Cl}_2$ -hexane) to give (±)-4 (71.6 mg, 72 %) as a colorless oil. FTIR (ATR):  $\nu$  2956, 2933, 2861, 1751, 1496, 1455, 1372, 1265, 1222, 1148, 1093, 785, 735, 699  $\text{cm}^{-1}$ .  $^1\text{H}$  NMR (500 MHz,  $\text{CDCl}_3$ ):  $\delta$  7.28 m (2H), 7.24 m (4 H), 5.57 (dd,  $J = 10.3, 1.4$  Hz, 1H), 2.70 m (1H), 2.47 m (1H), 2.41 m (1H), 2.21 m (1H), 1.70 m (1H), 1.35 m (1H), 0.92 (t,  $J = 6.8$  Hz, 3H).  $^{13}\text{C}$  NMR (125 MHz,  $\text{CDCl}_3$ ):  $\delta$  172.6 (C), 140.4 (CH), 128.7 (CH), 128.5 (CH), 126.5 (CH), 100.1 (C), 80.3 (C), 34.1 ( $\text{CH}_2$ ), 32.4 ( $\text{CH}_2$ ), 31.9 ( $\text{CH}_2$ ), 31.4 ( $\text{CH}_2$ ), 24.5 ( $\text{CH}_2$ ), 22.4 ( $\text{CH}_2$ ), 14.0 ( $\text{CH}_3$ ). HREIMS  $m/z$  373.0503  $[\text{M}+\text{Na}]^+$ ; calc. 373.0499 for  $\text{C}_{16}\text{H}_{21}\text{Cl}_3\text{O}_2\text{Na}$ .

### Preparation of (2-Chloro-1-cyclopropyl)-3-hydroxypropanoate esters, 6a and 6b

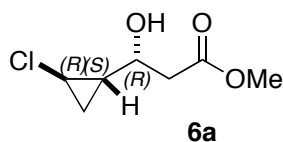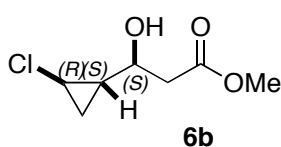

*Aldehyde.* A solution of alcohol (–)-5 (200 mg, 1.88 mmol, 86% ee)<sup>4</sup> in  $\text{CH}_2\text{Cl}_2$  (5 mL) was added to a mixture of pyridinium chlorochromate (2.83 g, 13 mmol) and Celite (2.83 g) in anhydrous  $\text{CH}_2\text{Cl}_2$  (11

mL) at room temperature. After stirring 3.5 h, the mixture was filtered through a bed of Florisil (elution with 2:3  $\text{Et}_2\text{O}$ /pentane). Fractions containing the aldehyde were combined and carefully concentrated under reduced pressure maintaining a bath temperature of 0 °C to give *aldehyde* (~ 100 mg, *volatile!*)<sup>5</sup> as a clear, colorless oil which was used in the next step without further purification.

(3) Corey, E. J.; Link, J. O.; Shao, Y. *Tetrahedron Lett.* **1992**, 33, 3435

(4) Masuno, M. N.; Young, D. M.; Hoepker, A. C.; Skepper, C. K.; Molinski, T. F. *J. Org. Chem.* **2005**, 70, 4162

(5) (a) Paterson, I.; Davies, R. D. M.; Marquez, R. *Angew. Chem., Int. Ed.* **2001**, 40, 603. (c) Huang, H.; Panek, J. S. *Org. Lett.* **2004**, 6, 4383. (c) Olivo, H. F.; Velaquez, F.; Trevisan, H. C. *Org. Lett.* **2000**, 2, 4055

*Reformatsky Reaction.*<sup>6</sup> Zn dust (1.26 g, 19.3 mmol) was suspended in anhydrous THF (8 mL) and the mixture heated to 40 °C. TMSCl (260 mg, 2.4 mmol) was added and the temperature elevated to 55 °C. After 15 minutes, the pressure of the reaction flask was reduced to 250-260 mm Hg to produce a steady reflux. Methyl bromoacetate (2.70 g, 17.7 mmol) was added dropwise over approximately 10 minutes at which time the mixture turned a yellow-green color. The mixture was stirred an additional 5 minutes then cooled to room temperature. After excess solids had settled, the supernatant was transferred under nitrogen through a nylon syringe filter (0.45 µm) into a clean, dry scintillation vial.

The resulting bromozincate reagent (~0.57 mmol) was added dropwise to a mixture of *aldehyde* (50 mg, 0.48 mmol) in THF (2 mL) at 0 °C and the pale yellow mixture stirred 20 minutes then allowed to warm to room temperature over 2 hours. The mixture was quenched with a mixture of concentrated NH<sub>4</sub>OH<sub>(aq)</sub> (2.3 mL) and saturated NH<sub>4</sub>Cl<sub>(aq)</sub> (23 mL) and extracted with Et<sub>2</sub>O (3 × 10 mL). The combined Et<sub>2</sub>O extracts were washed with brine, dried (MgSO<sub>4</sub>) and concentrated under reduced pressure. Flash chromatography (silica, 2:3 Et<sub>2</sub>O-pentane) gave an inseparable mixture of **6a** and **6b** (56 mg, 66 %, *dr* ~1:1) as a clear, colorless oil which was used immediately in the next step.

<sup>1</sup>H NMR (400 MHz, CDCl<sub>3</sub>) δ 3.78 (ddd, 1H, 9.0, 6.2, 3.2 Hz), 3.71 (s, 3H), 3.62 (ddd, 1H, 7.8, 6.6, 3.9 Hz), 3.04 (ddd, 1H, 7.2, 4.0, 3.9 Hz), 2.97 (ddd, 1H, 7.6, 3.6, 3.6 Hz), 2.67-2.52 (m, 2H, *overlap*), 1.37-1.29 (m, 1H, *overlap*), 1.08 (q, 1H, 6.7 Hz), 1.01-0.94 (m, 2H **6a**<sup>\*</sup> and 1H **6b**<sup>\*</sup>); LR-ESI-MS *m/z* 211.20 [M+Na]<sup>+</sup> \* arbitrary assignment.

## 2-Naphthone Ester Standards: **7a**, **7b**, **7c** and **7d**

A mixture of diastereomers **6a** and **6b** (1:1, *ee* 86%) (5.8 mg, 0.035 mmol) was dissolved in 250 µL of LiOH (1.45 mg, 0.053) and then stirred for 3 min, then added with 250 µL solution of α-bromo-2-acetonaphthalene (88 mg, 0.355 mmol) in THF and stirred vigorously at RT for 24 h. The reaction mixture was neutralized with 250 µL HCl (1.90 mg, 0.053) to pH 6.0 the extracted with 1 mL CHCl<sub>3</sub> (3x). The organic layer was dried under reduced pressure to form a yellow solid residue which then purified by flash chromatography 8:2 EtOAc:hexane to yield the mixture of diastereomers (5.4 mg, 23 % yield) as colorless oil. Individual diastereomers were separated by HPLC (3:7 *i*-PrOH-hexane, chiral column, Chiralpak® AD, 250 × 4.6 mm) to afford pure samples of **7a** (*t*<sub>R min</sub> = 11.68), **7c** (*t*<sub>R</sub> = 13.05), **7d** (*t*<sub>R</sub> = 13.74) and **7b** (*t*<sub>R</sub> = 14.83) in the ratios 10:0.9:0.6:7.5 respectively.

(6) (a) Reformatsky, S. *Chem. Ber.* **1887**, 20, 1210. (b) Kloetzing, R. J.; Thaler, T.; Knochel, P. *Org. Lett.* **2006**, 8, 1125.

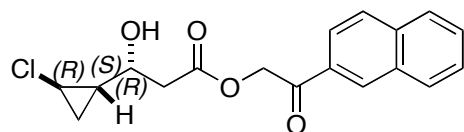

**(R)-2-(naphthalen-2-yl)-2-oxoethyl**

**3-((1S,2R)-2-**

**chlorocyclopropyl)-3-hydroxypropanoate, 7a**, colorless solid.

FTIR (ATR):  $\nu$  3571 (broad peak), 2973, 2254, 1625, 1281, 952,

674, 648, 615. UV (hexane:*i*-PrOH, 70:30)  $\lambda$  209 nm ( $\epsilon$  5700) 248 (34300), 284 (6487).  $^1\text{H}$  NMR (600 MHz,  $\text{CDCl}_3$ ):  $\delta$  8.44 (s, 1H), 7.95 (m, 3H), 7.89 (d,  $J$  = 7.8 Hz, 1H), 7.65 (t,  $J$  = 8.0 Hz, 1H), 7.59 (t,  $J$  = 8.2 Hz, 1H), 5.64 (d,  $J$  = 16.3 Hz, 1H), 5.54 (d,  $J$  = 16.3 Hz, 1H), 4.03 (m, 1H), 3.65 (d,  $J$  = 3.7 Hz, 1H), 3.09 (ddd,  $J$  = 7.2, 3.7, 3.0 Hz, 1H), 2.85 (dd,  $J$  = 14.8, 3.0 Hz, 1H), 2.74 (dd,  $J$  = 14.8, 9.4 Hz, 1H), 1.43 (dddd,  $J$  = 9.4, 9.4, 6.5, 3.1 Hz, 1H), 1.19 (q,  $J$  = 13.8, 6.5 Hz, 1H), 1.03 (m, 1H).  $^{13}\text{C}$  NMR<sup>7</sup>:  $\delta$  192.2 (C), 171.0 (C), 136.0 (C), 132.1 (C), 130.7 (C), 130.1 (CH), 130.0 (CH), 129.5 (CH), 129.1 (CH), 127.9 (CH), 127.4 (CH), 123.2 (CH), 67.7 (CH), 66.2 ( $\text{CH}_2$ ), 42.3 ( $\text{CH}_2$ ), 30.3 (CH), 27.4 (CH), 13.1 ( $\text{CH}_2$ ). HREIMS  $m/z$  355.0712 [ $\text{M}+\text{Na}$ ]<sup>+</sup>; calcd. 355.0708 for  $\text{C}_{18}\text{H}_{17}\text{ClNaO}_4$ .

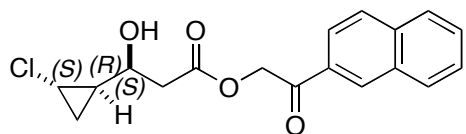

**(S)-2-(naphthalen-2-yl)-2-oxoethyl**

**3-((1R,2S)-2-**

**chlorocyclopropyl)-3-hydroxypropanoate, 7c**, colorless solid.

FTIR (ATR):  $\nu$  3571 (broad peak), 2973, 2254, 1625, 1281, 952,

674, 648, 615. UV (hexane:*i*-PrOH, 70:30)  $\lambda$  209 nm ( $\epsilon$  5700) 248 (34300), 284 (6487).  $^1\text{H}$  NMR (600 MHz,  $\text{CDCl}_3$ ):  $\delta$  8.44 (s, 1H), 7.95 (m, 3H), 7.89 (d,  $J$  = 7.8 Hz, 1H), 7.65 (t,  $J$  = 8.0 Hz, 1H), 7.59 (t,  $J$  = 8.2 Hz, 1H), 5.64 (d,  $J$  = 16.3 Hz, 1H), 5.54 (d,  $J$  = 16.3 Hz, 1H), 4.03 (m, 1H), 3.65 (d,  $J$  = 3.7 Hz, 1H), 3.09 (ddd,  $J$  = 7.2, 3.7, 3.0 Hz, 1H), 2.85 (dd,  $J$  = 14.8, 3.0 Hz, 1H), 2.74 (dd,  $J$  = 14.8, 9.4 Hz, 1H), 1.43 (dddd,  $J$  = 9.4, 9.4, 6.5, 3.1 Hz, 1H), 1.19 (q,  $J$  = 13.8, 6.5 Hz, 1H), 1.03 (m, 1H).  $^{13}\text{C}$  NMR<sup>7</sup>:  $\delta$  192.2 (C), 171.0 (C), 136.0 (C), 132.1 (C), 130.7 (C), 130.1 (CH), 130.0 (CH), 129.5 (CH), 129.1 (CH), 127.9 (CH), 127.4 (CH), 123.2 (CH), 67.7 (CH), 66.2 ( $\text{CH}_2$ ), 42.3 ( $\text{CH}_2$ ), 30.3 (CH), 27.4 (CH), 13.1 ( $\text{CH}_2$ ). HREIMS  $m/z$  355.0716 [ $\text{M}+\text{Na}$ ]<sup>+</sup>; calcd. 355.0708 for  $\text{C}_{18}\text{H}_{17}\text{ClNaO}_4$ .

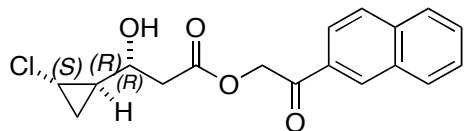

**(R)-2-(naphthalen-2-yl)-2-oxoethyl**

**3-((1R,2S)-2-**

**chlorocyclopropyl)-3-hydroxypropanoate, 7d**, colorless solid.

FTIR (ATR):  $\nu$  3571 (br), 2973, 2254, 1625, 1281, 952, 674,

648, 615. UV (hexane:*i*-PrOH, 70:30)  $\lambda$  209 nm ( $\epsilon$  5700) 248 (34300), 284 (6487).  $^1\text{H}$  NMR (600 MHz,  $\text{CDCl}_3$ ):  $\delta$  8.44 (s, 1H), 7.95 (m, 3H), 7.89 (d,  $J$  = 8.1 Hz, 1H), 7.65 (t,  $J$  = 8.0 Hz, 1H), 7.59 (t,  $J$

(7) Measured indirectly and assigned by HSQC and HMBC (600 MHz,  $\text{CDCl}_3$ ).

= 8.2 Hz, 1H), 5.64 (d,  $J$  = 16.3 Hz, 1H), 5.54 (d,  $J$  = 16.3 Hz, 1H), 3.84 (m, 1H), 3.67 (d,  $J$  = 3.7 Hz, 1H), 3.16 (ddd,  $J$  = 7.2, 3.7, 3.0 Hz, 1H), 2.84 (dd,  $J$  = 14.8, 3.0 Hz, 1H), 2.78 (dd,  $J$  = 14.8, 9.4 Hz, 1H), 1.45 (dddd,  $J$  = 9.4, 9.4, 6.5, 3.1 Hz, 1H), 1.07 (q,  $J$  = 13.8, 6.5 Hz, 1H), 1.03 (m, 1H). HREIMS  $m/z$  355.0710  $[M+Na]^+$ ; calcd. 355.0708 for  $C_{18}H_{17}ClNaO_4$ .

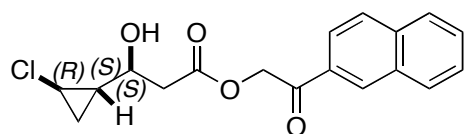

**(S)-2-(naphthalen-2-yl)-2-oxoethyl**

**3-((1S,2R)-2-**

**chlorocyclopropyl)-3-hydroxypropanoate, 7b**, colorless solid.

FTIR (ATR):  $\nu$  3571 (broad peak), 2973, 2254, 1625, 1281, 952,

674, 648, 615. UV (hexane:*i*-PrOH, 70:30)  $\lambda$  209 nm ( $\epsilon$  5700) 248 (34300), 284 (6487).  $^1H$  NMR (600 MHz,  $CDCl_3$ ):  $\delta$  8.44 (s, 1H), 7.95 (m, 3H), 7.89 (d,  $J$  = 8.1 Hz, 1H), 7.65 (t,  $J$  = 8.0 Hz, 1H), 7.59 (t,  $J$  = 8.2 Hz, 1H), 5.64 (d,  $J$  = 16.3 Hz, 1H), 5.54 (d,  $J$  = 16.3 Hz, 1H), 3.84 (m, 1H), 3.67 (d,  $J$  = 3.7 Hz, 1H), 3.16 (ddd,  $J$  = 7.2, 3.7, 3.0 Hz, 1H), 2.84 (dd,  $J$  = 14.8, 3.0 Hz, 1H), 2.78 (dd,  $J$  = 14.8, 9.4 Hz, 1H), 1.45 (dddd,  $J$  = 9.4, 9.4, 6.5, 3.1 Hz, 1H), 1.07 (q,  $J$  = 13.8, 6.5 Hz, 1H), 1.03 (m, 1H).  $^{13}C$  NMR<sup>7</sup>:  $\delta$  192.2 (C), 171.0 (C), 136.0 (C), 132.1 (C), 131.7 (C), 130.1 (CH), 130.0 (CH), 129.5 (CH), 129.1 (CH), 127.9 (CH), 127.4 (CH), 123.2 (CH), 68.7 (CH), 66.2 ( $CH_2$ ), 42.0 ( $CH_2$ ), 30.3 (CH), 27.5 (CH), 13.5 ( $CH_2$ ). HREIMS  $m/z$  355.0710  $[M+Na]^+$ ; calcd. 355.0708 for  $C_{18}H_{17}ClNaO_4$ .

**Preparation of (R)- and (S)-MTPA esters of (R)-2-(naphthalen-2-yl)-2-oxoethyl 3-((1S,2R)-2-chlorocyclopropyl)-3-hydroxypropanoate.** Separate solutions of **7a** (100  $\mu$ g) in dry pyridine (100  $\mu$ L) were treated with added (R)- or (S)-MTPACl (5  $\mu$ L) and the mixture stirred vigorously at r.t. for 2 h. The reaction mixtures were concentrated by under reduced pressure and each residue purified by silica gel chromatography (pencil column) with elution by 9:1 EtOAc:hexanes to afford pure (S)-**8** (white solid; 100  $\mu$ g, 85%) or (R)-**9** (white solid; 100  $\mu$ g; 86%).

(S)-MTPA Ester of **7a** (**S8**):  $^1H$  NMR (600 MHz,  $CDCl_3$ ):  $\delta$  8.44 (s, 1H), 7.95 (m, 3H), 7.90 (d,  $J$  = 8.0 Hz, 1H), 7.64 (t,  $J$  = 8.1 Hz, 1H), 7.59 (t,  $J$  = 8.1 Hz, 1H), 7.52 (m, 2H), 7.41 (m, 4H), 5.53 (d,  $J$  = 16.1 Hz, 1H), 5.48 (d,  $J$  = 16.1 Hz, 1H), 5.16 (m, 1H), 3.54 (s, 3H), 3.09 (dd,  $J$  = 16.4, 8.2 Hz, 1H), 3.03 (dd,  $J$  = 16.4, 4.9 Hz, 1H), 3.00 (m, 1H), 1.43 (dddd,  $J$  = 9.4, 9.4, 6.5, 3.1 Hz, 1H), 1.19 (q,  $J$  = 13.8, 6.5 Hz, 1H), 1.08 (m, 1H). HREIMS  $m/z$  571.1102  $[M+Na]^+$ ; calc. 571.1106 for  $C_{28}H_{24}ClNaF_3O_6$ .

(*R*)-MTPA Ester of **7a** (**S9**):  $^1\text{H}$  NMR (600 MHz,  $\text{CDCl}_3$ ):  $\delta$  8.44 (s, 1H), 7.95 (m, 3H), 7.90 (d,  $J = 8.0$  Hz, 1H), 7.64 (t,  $J = 8.1$  Hz, 1H), 7.59 (t,  $J = 8.1$  Hz, 1H), 7.52 (m, 2H), 7.41 (m, 4H), 5.42 (d,  $J = 16.2$  Hz, 1H), 5.39 (d,  $J = 16.2$  Hz, 1H), 5.14 (m, 1H), 3.55 (s, 3H), 3.10 (m, 1H), 3.03 (dd,  $J = 16.0, 8.0$  Hz, 1H), 2.98 (dd,  $J = 16.0, 5.4$  Hz, 1H), 1.43 (dddd,  $J = 9.4, 9.4, 6.5, 3.1$  Hz, 1H), 1.19 (q,  $J = 13.8, 6.5$  Hz, 1H), 1.15 (m, 1H). HREIMS  $m/z$  571.1120  $[\text{M}+\text{Na}]^+$ ; calc. 571.1106 for  $\text{C}_{28}\text{H}_{24}\text{ClNaF}_3\text{O}_6$ .

### Hydrolysis-Derivatization of **1** with $\alpha$ -Bromo-2-Acetonaphthalene

Muironolide A (**1**, 30  $\mu\text{g}$ , 0.050 mmole) was dissolved in THF (50  $\mu\text{L}$ ) and treated with aqueous LiOH solution (0.002 M, 50  $\mu\text{L}$ ), and the mixture stirred at r.t. for 1.5 h before neutralization with aqueous HCl (0.002 M, 50  $\mu\text{L}$ ). The mixture was dried under the stream of  $\text{N}_2$  and the residue re-dissolved in a mixture of  $\text{H}_2\text{O}$  (25  $\mu\text{L}$ , HPLC grade) and aqueous LiOH (0.001 M, 50  $\mu\text{L}$ ), stirred for 5 min, then treated with solution of  $\alpha$ -bromo-2-acetonaphthalene (3M, 50  $\mu\text{L}$ , 0.151 mmol.) in THF and stirred vigorously at rt for 24 h. The reaction mixture was diluted with  $\text{H}_2\text{O}$  (500  $\mu\text{L}$ ) and extracted with  $\text{CHCl}_3$  ( $3 \times 500$   $\mu\text{L}$ ). The combined organic layers were concentrated under reduced pressure and the residue purified by flash chromatography (silica, pencil column, 30 mm) eluting with 1:4 EtOAc-hexane. Fractions corresponding to the product were pooled and dried under reduced pressure and dissolved in 20  $\mu\text{L}$  of  $\text{CH}_3\text{CN}$  (HPLC grade) for LCMS analysis.

### LC-ESI-MS Analysis

The acetonaphthone derivative of **1** was analysed by LC-MS using a ThermoElectron Accela series ultra-high pressure liquid chromatograph (UPLC) and a ChiralPak AD-RH column (2.1 x 150 mm, 5  $\mu$ ) connected to a PDA and ThermoFinnigan MSQ quadrupole mass spectrometer. LC parameters were as follows; isocratic 1:4  $\text{HCOOH}$  (0.1% aq)– $\text{CH}_3\text{CN}$ , 80% (0.2 mL/min, over 20 min. Injection volume was 3  $\mu\text{L}$ . PDA parameters were as follows; channel A, 210 nm; channel B, 248 nm; channel C, 284 nm. MSQ parameters were as follows; ESI-MS, selected ion monitoring at  $m/z$  355.07  $[\text{M}+\text{Na}]^+$ , span 1.5 amu; dwell, 0.6 sec; cone voltage, 75V; probe temperature 450  $^\circ\text{C}$ . Retention times (min) for the naphthone ester derivatives were as follows: **7a**,  $t_R = 13.84$ ; **7c**,  $t_R = 9.05$ ; **7d**,  $t_R = 9.90$ ; **7b**,  $t_R = 11.13$ . The naphthone ester, derived from hydrolysis-derivation of **1**, eluted at  $t_R = 11.13$  min. and was confirmed by co-injections with standard naphthone ester **7b** that co-eluted as a single peak ( $t_R = 11.11$  min). See Figure S20.

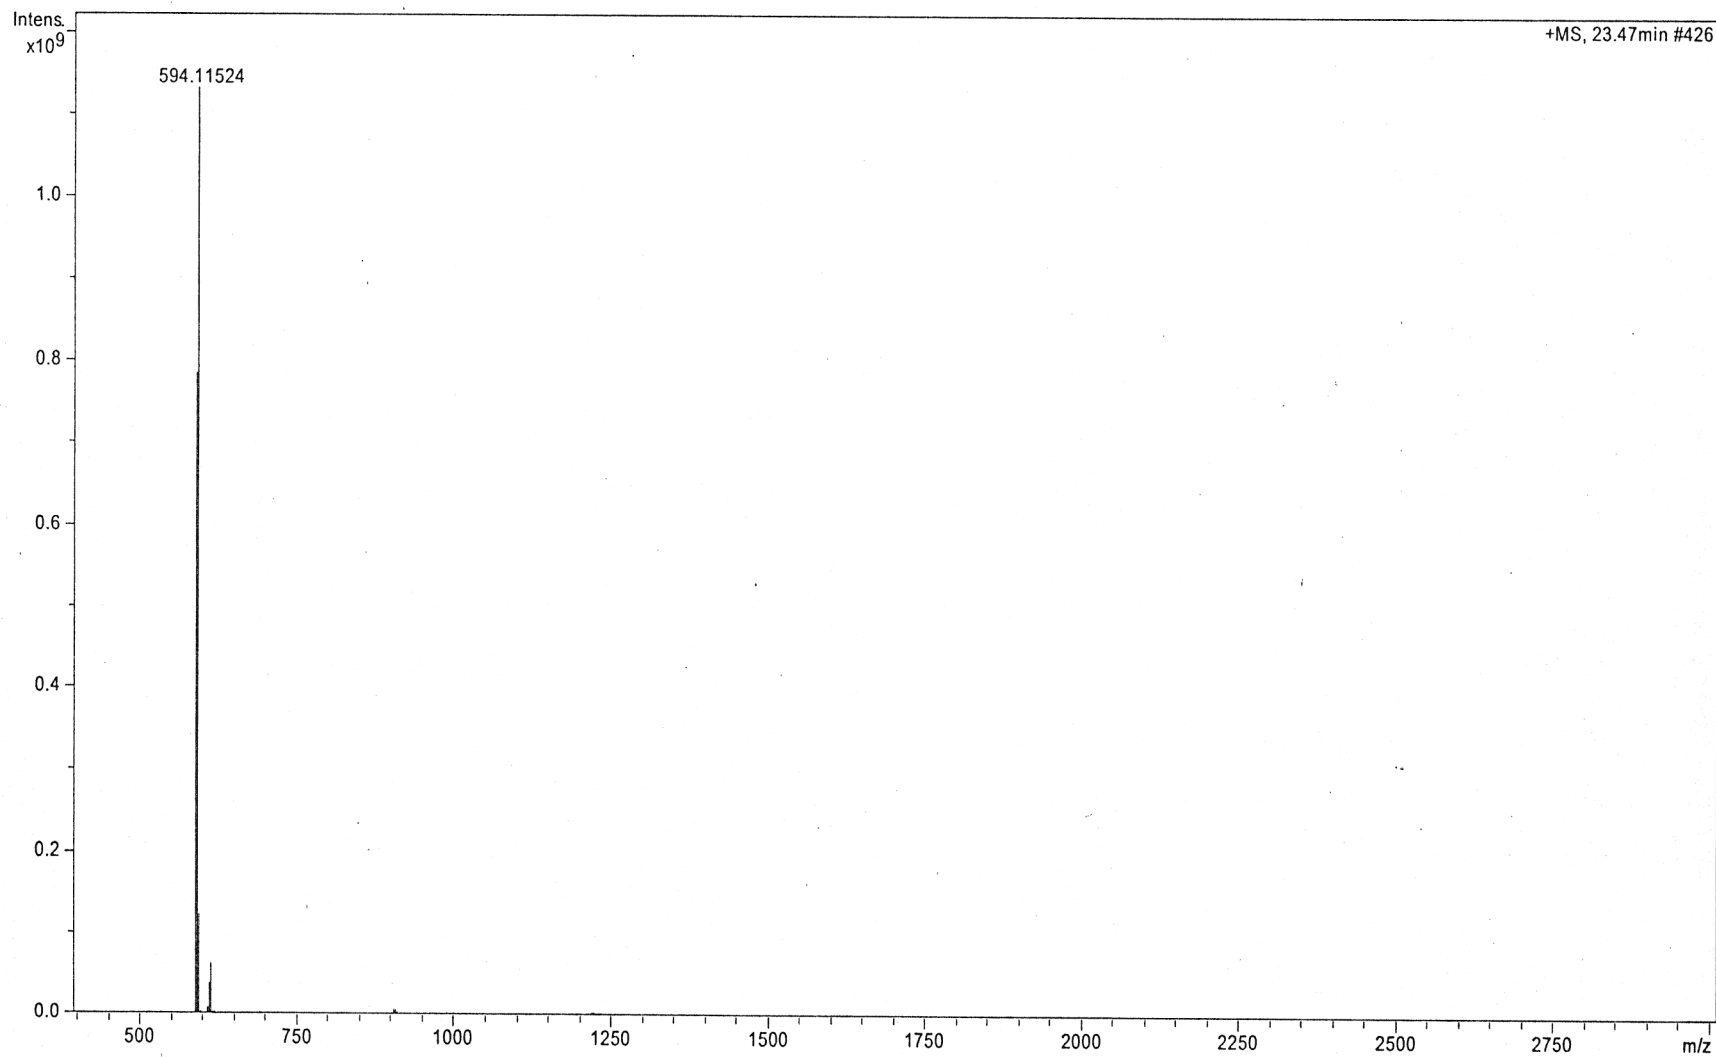

**Fig. S4.** LC-ESI-FT-ICR HRMS (+ve ion mode). 7.0T Bruker q-FT-ICR interfaced with an Agilent 1200 capillary LC (500  $\mu$  ID x 15 cm Zorbax, 10  $\mu$ L/min).



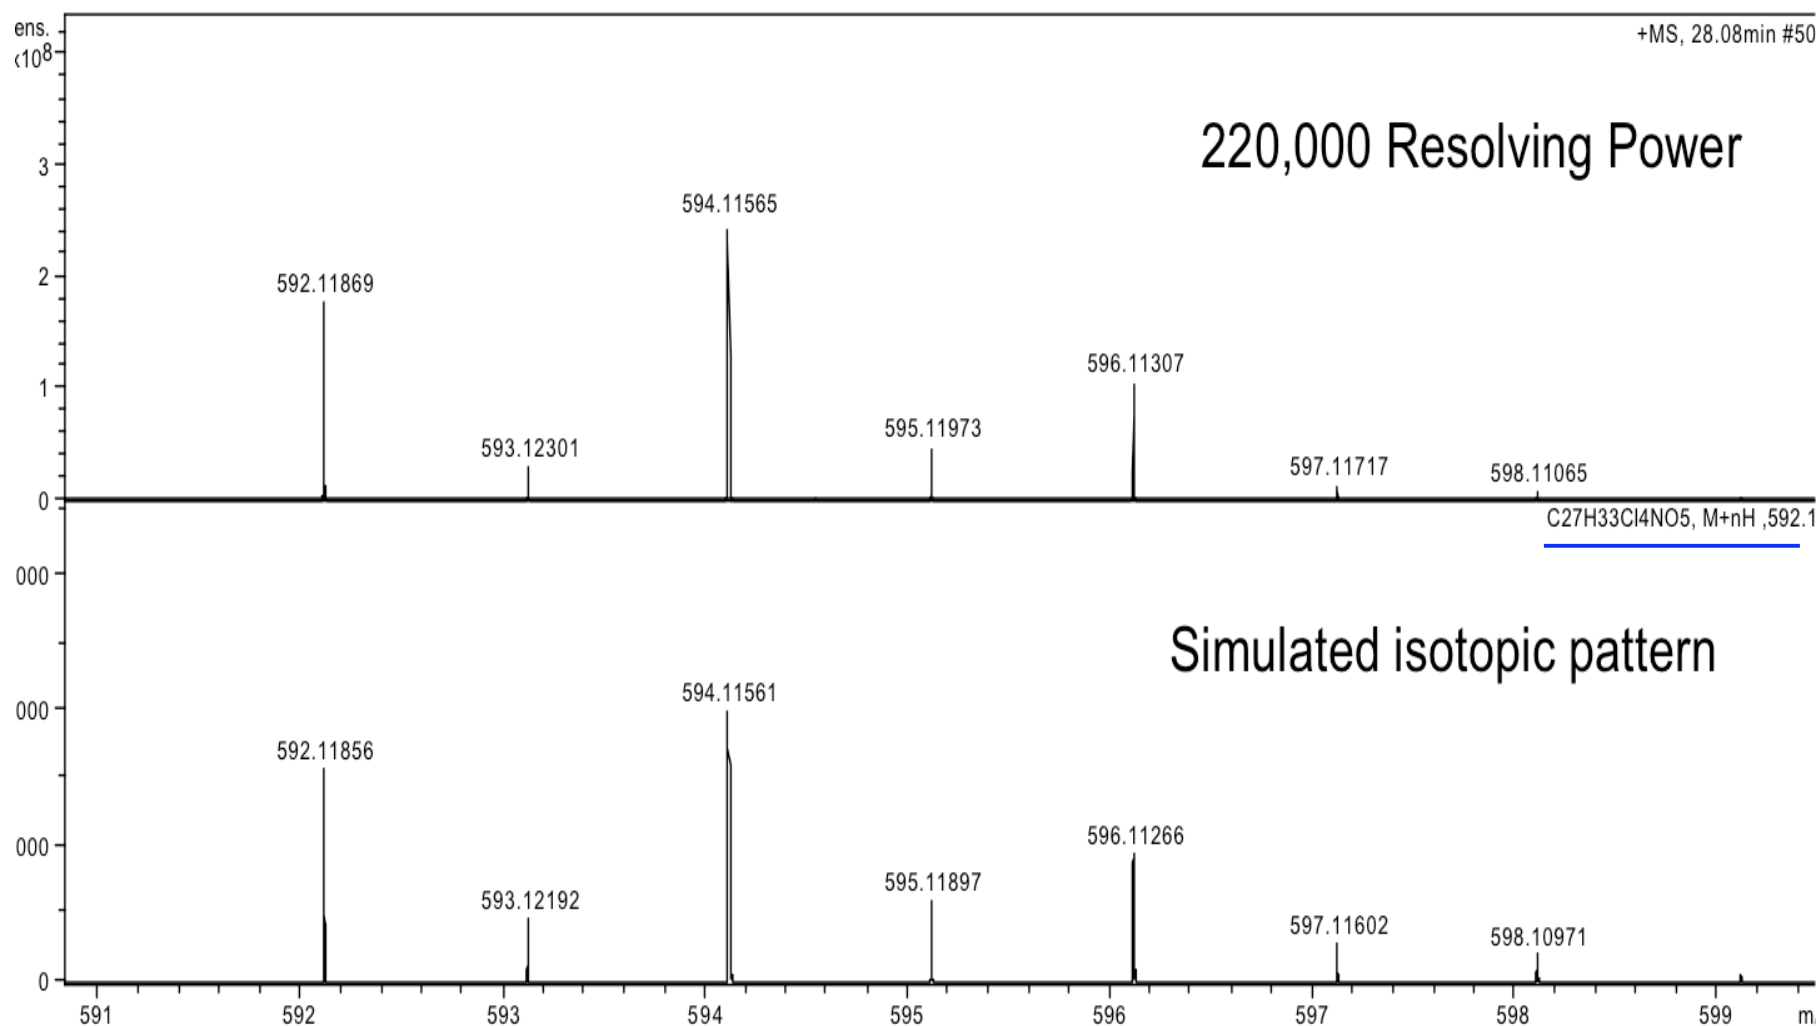

**Figure S5.** LC-ESI-FT-ICR HRMS (+ve ion mode). Expansion of Figure S4 and simulated isotopic pattern.

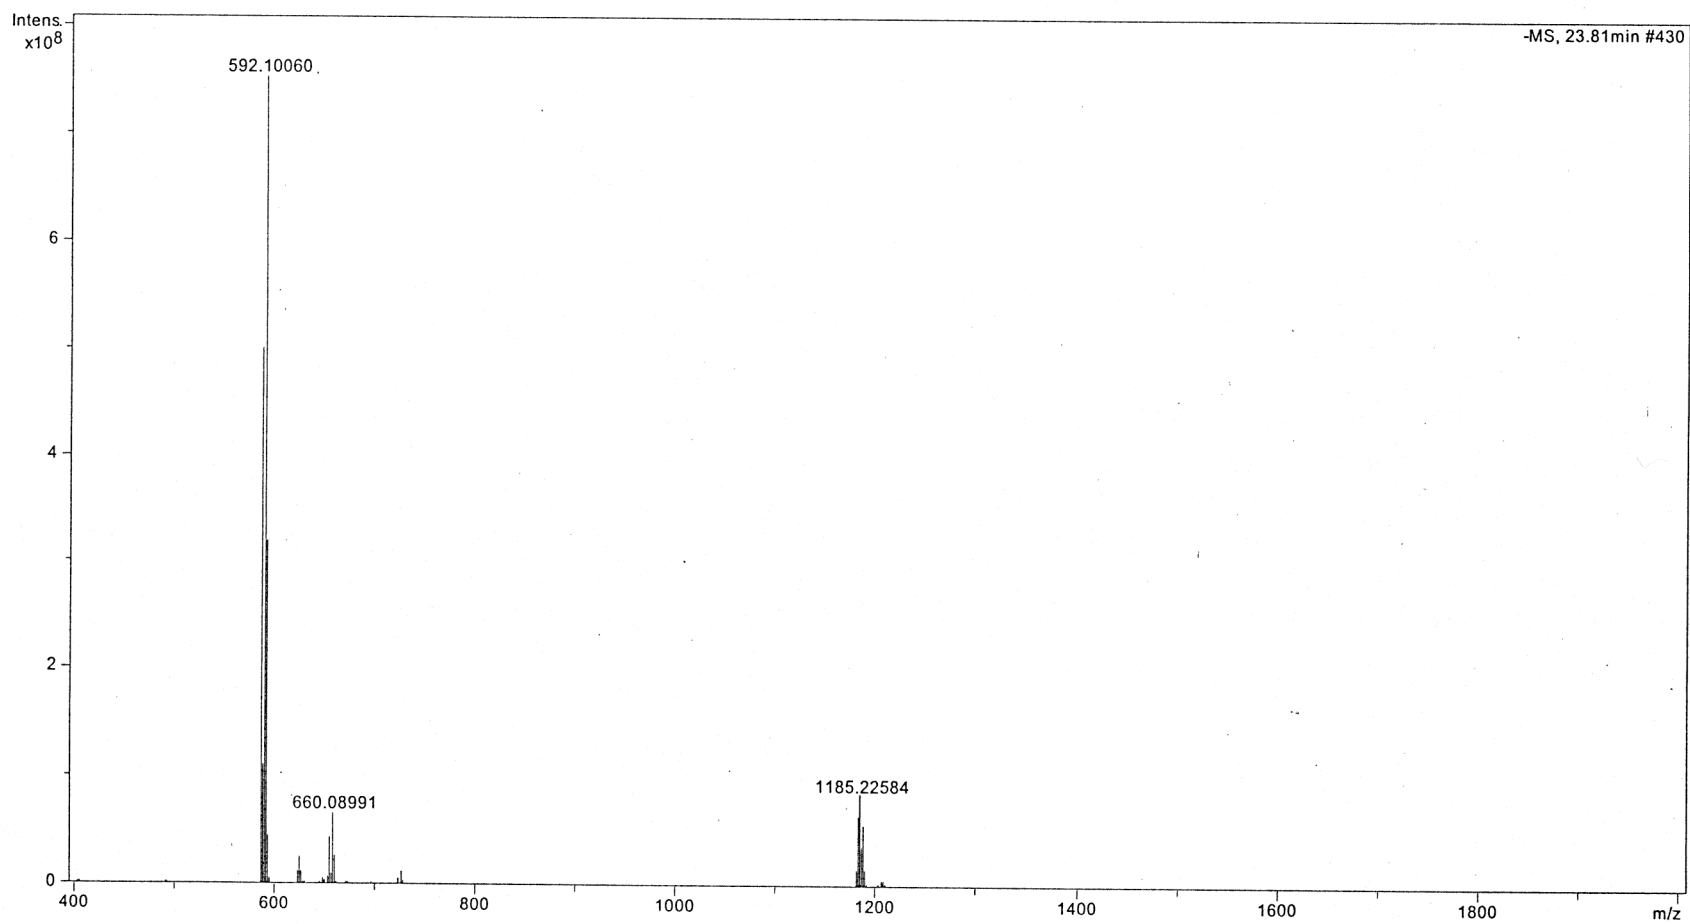

**Figure S6.** LC-ESI-FT-ICR HRMS (–ve ion mode). 7.0T Bruker q-FT-ICR interfaced with an Agilent 1200 capillary LC (500  $\mu$  ID x 15 cm Zorbax, 10  $\mu$ L/min).

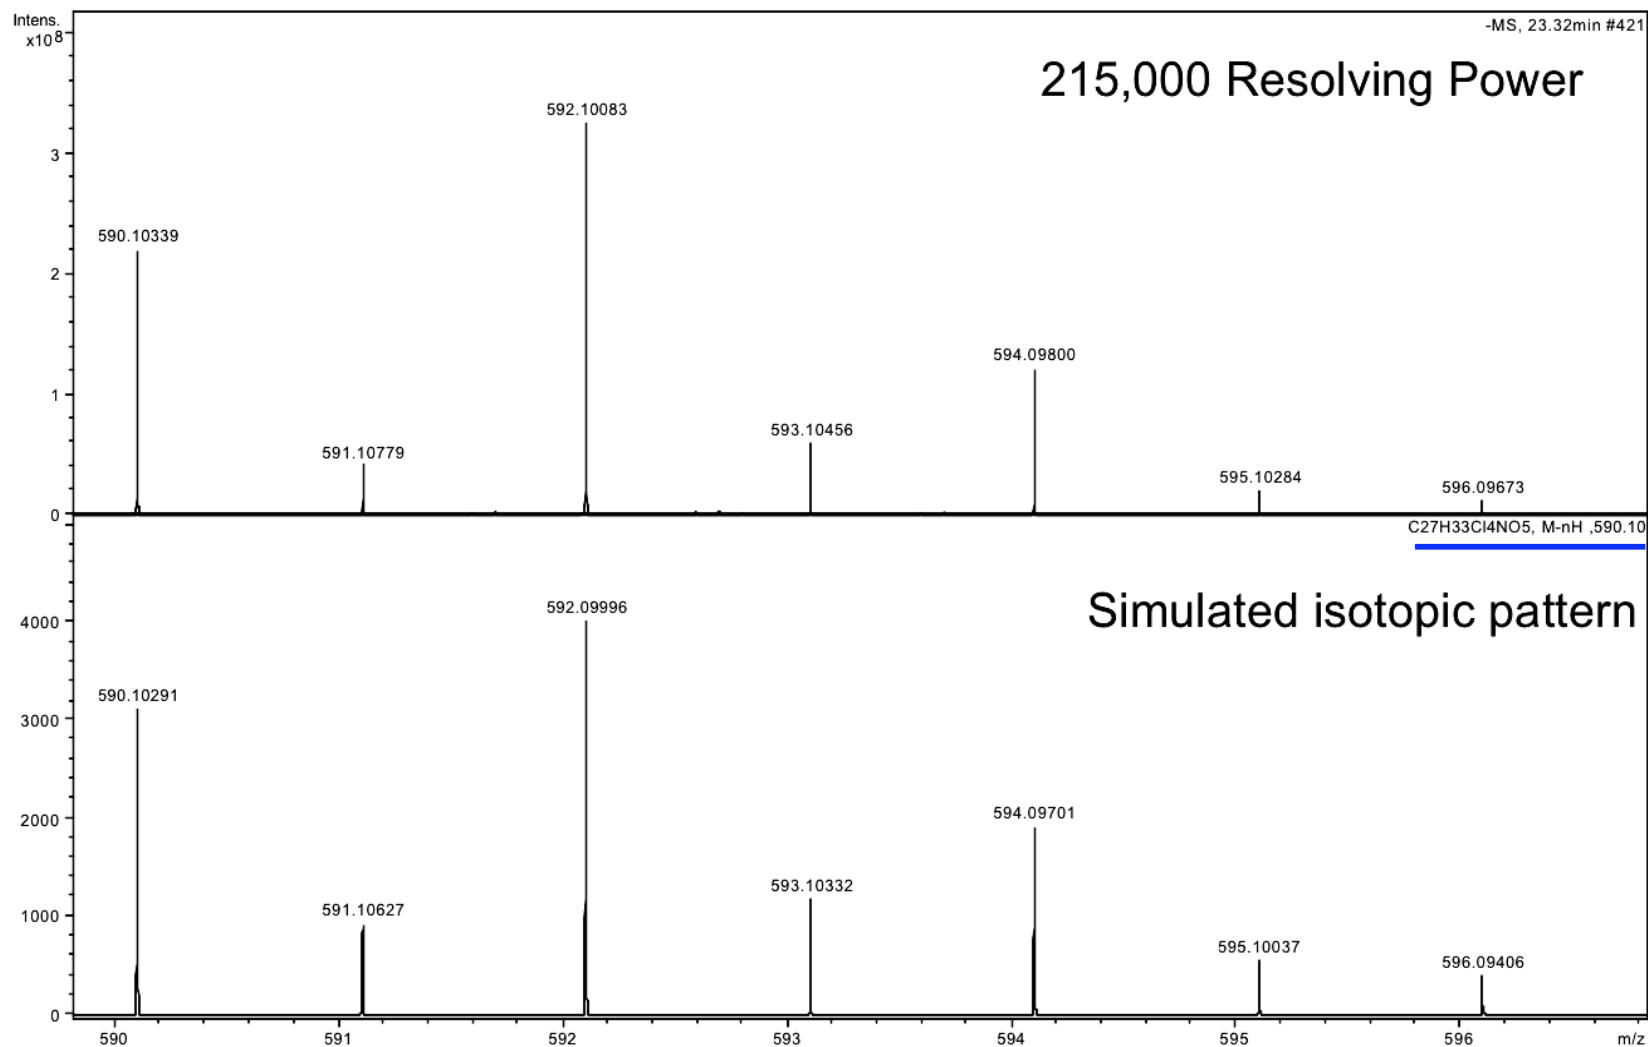

**Figure S7.** LC-ESI-FT-ICR HRMS (–ve ion mode). Expansion of Figure S6 and simulated isotopic pattern.

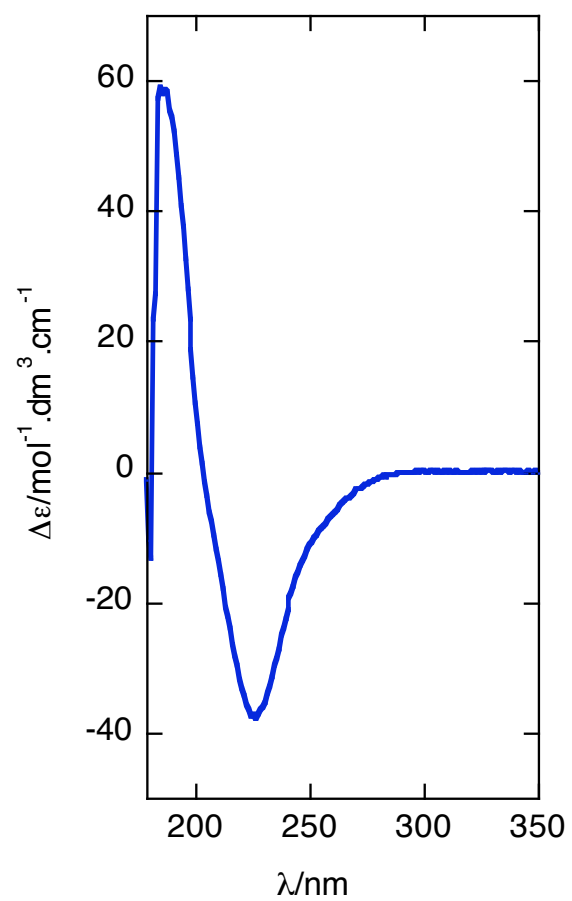

**Figure S8.** Circular dichroism (CD) spectrum of **1**. Concentration  $2.5 \times 10^{-4}$  M in  $\text{CH}_3\text{CN}$ .  $\lambda_{\text{max}}$  ( $\Delta\epsilon$ ) 186 (58.5), 225 (-37.2).

**Table S1.**  $^1\text{H}$  and  $^{13}\text{C}$  data of muironolide A, **1** (600 MHz, 1.7 mm cryoprobe,  $\text{CDCl}_3$ )

| Position | $^1\text{H}$ (m, $J$ = Hz)      | $^{13}\text{C}^a$ (m, $J_{\text{CH}}$ = Hz) | COSY                 | HMBC <sup>a</sup>                   | NOESY <sup>b</sup>   |
|----------|---------------------------------|---------------------------------------------|----------------------|-------------------------------------|----------------------|
| 1        |                                 | 164.4                                       |                      |                                     |                      |
| 2        | 5.77 (d, 15.5)                  | 124.8 (CH, 161.5)                           | H3                   | C1, C4                              | H4, H13              |
| 3        | 6.53 (dd, 15.5, 11.6)           | 146.9 (CH, 164.5)                           | H2, H4               | C1, C2, C4, C5, C11                 | H6, H11              |
| 4        | 2.45 (t, 11.6)                  | 53.6 (CH, 128.4)                            | H3, H11              | C2, C3, C5, C6, C10, C11, C12, C25  | H2, H10, H13, H25    |
| 5        |                                 | 44.0                                        |                      |                                     |                      |
| 6        | 3.33 (d, 8.8)                   | 49.0 ( $\text{CH}_2$ , 141.6)               | H6'                  | C4, C5, C25                         | H3, H6', H11, -NH    |
|          | 2.84 (br d, 8.8)                | 49.0 ( $\text{CH}_2$ , 147.6)               | H6, -NH              | C5, C7, C8, C25                     | H6, H25, -NH         |
| 7        |                                 | 169.7                                       |                      |                                     |                      |
| 8        |                                 | 139.7                                       |                      |                                     |                      |
| 9        | 6.73 (dd, 7.8, 2.5)             | 130.0 (CH, 165.0)                           | H10, H10'            | C7, C10, C11                        | H10, H10'            |
| 10       | 1.92 (m)                        | 31.3 ( $\text{CH}_2$ , 136.8)               | H9, H10', H11        | C4, C8, C9, C11                     | H9, H10', H13,       |
|          | 2.40 (m)                        | 31.3 ( $\text{CH}_2$ , 134.4)               | H9, H10, H11         | C8, C9, C11, C12                    | H9, H10, H11         |
| 11       | 1.70 (ddd, 11.6, 8.7, 2.8)      | 46.2 (CH, 131.4)                            | H4, H10, H10'        | C3, C4, C5, C9, C12, C13, C15, C26, | H3, H6, H10'         |
| 12       |                                 | 133.8                                       |                      |                                     |                      |
| 13       | 4.88 (d, 9.12)                  | 131.6 (CH, 150.0)                           | H14, H26             | C11, C15, C26                       | H2, H15              |
| 14       | 2.42 (m)                        | 30.8 (CH, 137.4)                            | H13, H15, H15', H27  | C15                                 | H15', H16', H26, H27 |
| 15       | 1.16 (m)                        | 31.4 ( $\text{CH}_2$ , 131.4)               | H14, H15', H16       | C13, C14, C17,                      | H14, H15, H16, H17   |
|          | 1.05 (m)                        | 31.4 ( $\text{CH}_2$ , 131.4)               | H14, H15, H16        | C13, C14, C16, C17, C27             | H13, H15', H16, H16' |
| 16       | 1.95 (m)                        | 27.1 ( $\text{CH}_2$ , 131.4)               | H15, H15', H16', H17 | C14, C15, C18                       | H15', H16'           |
|          | 2.04 (m)                        | 27.1 ( $\text{CH}_2$ , 131.4)               | H15, H15', H16, H17  | C14, C15, C18                       | H14, H15, H17        |
| 17       | 5.55 (dd, 10.8, 2.4)            | 80.3 (CH, 157.5)                            | H16, H16'            | C15, C16, C19, C18                  | H14, H15', H16'      |
| 18       |                                 | 99.3                                        |                      |                                     |                      |
| 19       |                                 | 168.9                                       |                      |                                     |                      |
| 20       | 2.90 (dd, 16.2, 3.0)            | 39.4 ( $\text{CH}_2$ , 123.0)               | H20', H21            | C19, C21, C22                       | H21                  |
|          | 2.94 (dd, 16.2, 11.6)           | 39.4 ( $\text{CH}_2$ , 123.0)               | H20, H21             | C19, C21, C22                       | H21                  |
| 21       | 5.03 (ddd, 11.6, 9.4, 3.2)      | 70.8 (CH, 153.6)                            | H20, H20', H22       | C1, C19, C20, C22, C23, C24         | H20, H20', H23, H24' |
| 22       | 1.44 (dddd, 9.4, 9.4, 6.3, 3.2) | 25.6 (CH, 177.0)                            | H21, H23, H24, H24'  | C23                                 | H24                  |
| 23       | 2.98 (ddd, 6.5, 3.7, 3.2)       | 30.0 (CH, 200.4)                            | H22, H24, H24'       | C21, C22                            | H21, H24'            |
| 24       | 1.09 (ddd, 9.4, 6.5, 3.7)       | 14.7 ( $\text{CH}_2$ , 173.4)               | H22, H23, H24'       | C21, C22, C23                       | H22, H24             |
|          | 1.25 (q, 6.5)                   | 14.7 ( $\text{CH}_2$ , 173.4)               | H22, H23, H24        | C21, C22                            | H21, H23, H24        |
| 25       | 1.28 (s)                        | 27.7 ( $\text{CH}_3$ , 130.0)               |                      | C4, C5, C6, C8                      | H4, H6               |
| 26       | 1.56 (s)                        | 19.1 ( $\text{CH}_3$ , 128.4)               | H13                  | C11, C12, C13                       | H14                  |

<sup>a</sup>. Assigned by HSQC ( $^1J_{\text{CH}}$  = 190 Hz) and HMBC ( $^1J_{\text{CH}}$  = 6 Hz). <sup>b</sup>. Mixing time = 400 ms.

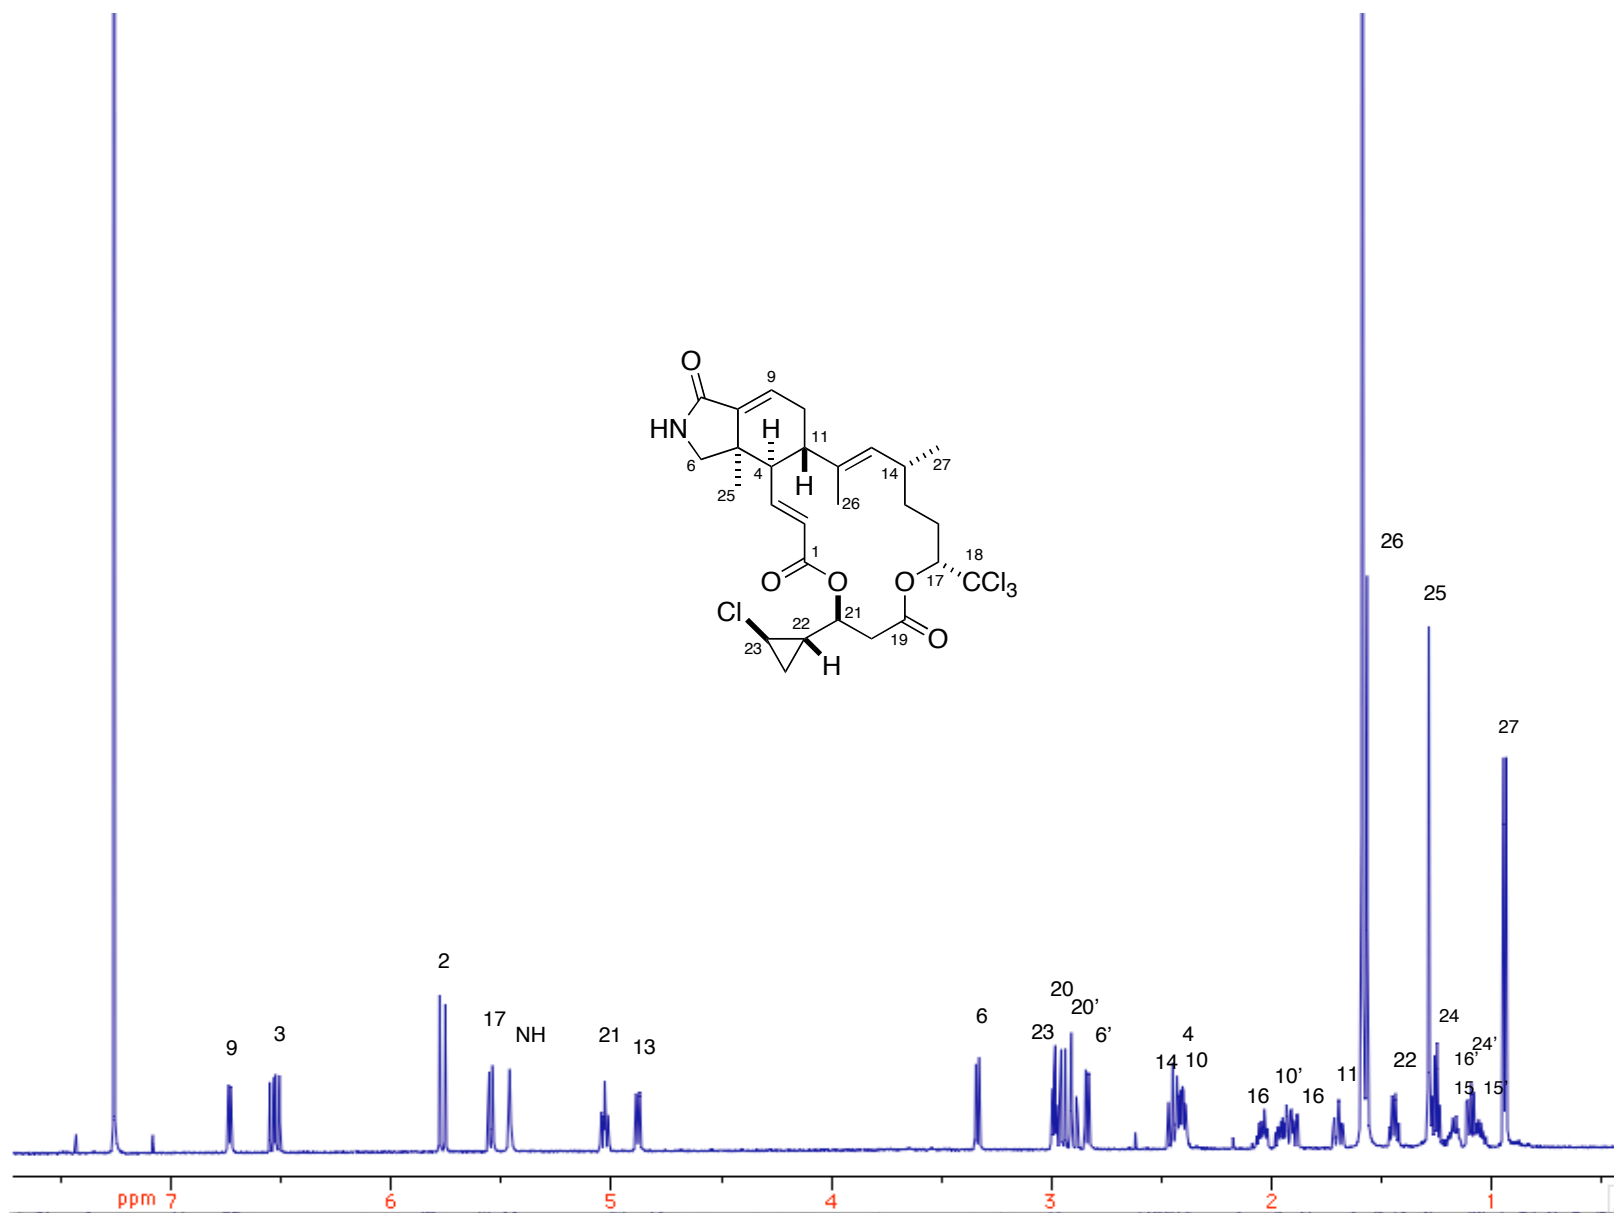

**Figure S9**  $^1\text{H}$  NMR spectrum of **1** (90  $\mu\text{g}$ , 152 nmole) (600 MHz,  $\text{CDCl}_3$ )

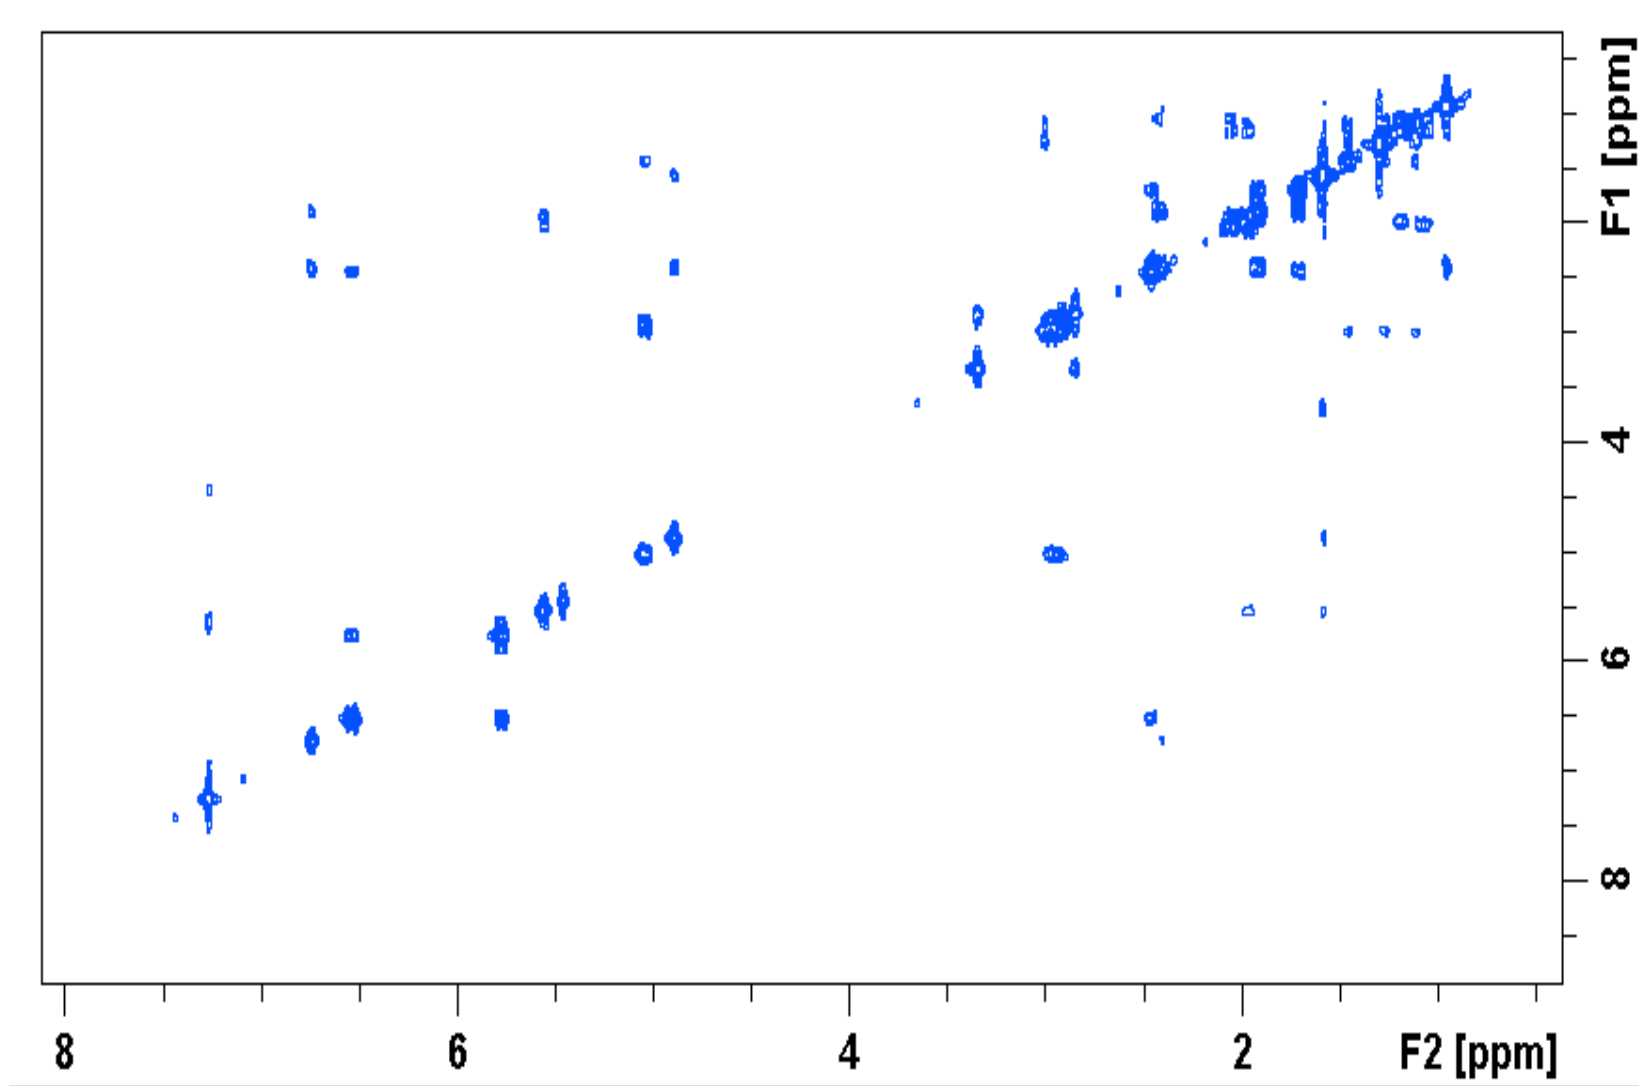

**Figure S10.** COSY NMR spectrum of **1** (90  $\mu$ g, 152 nmole) (600 MHz,  $\text{CDCl}_3$ )

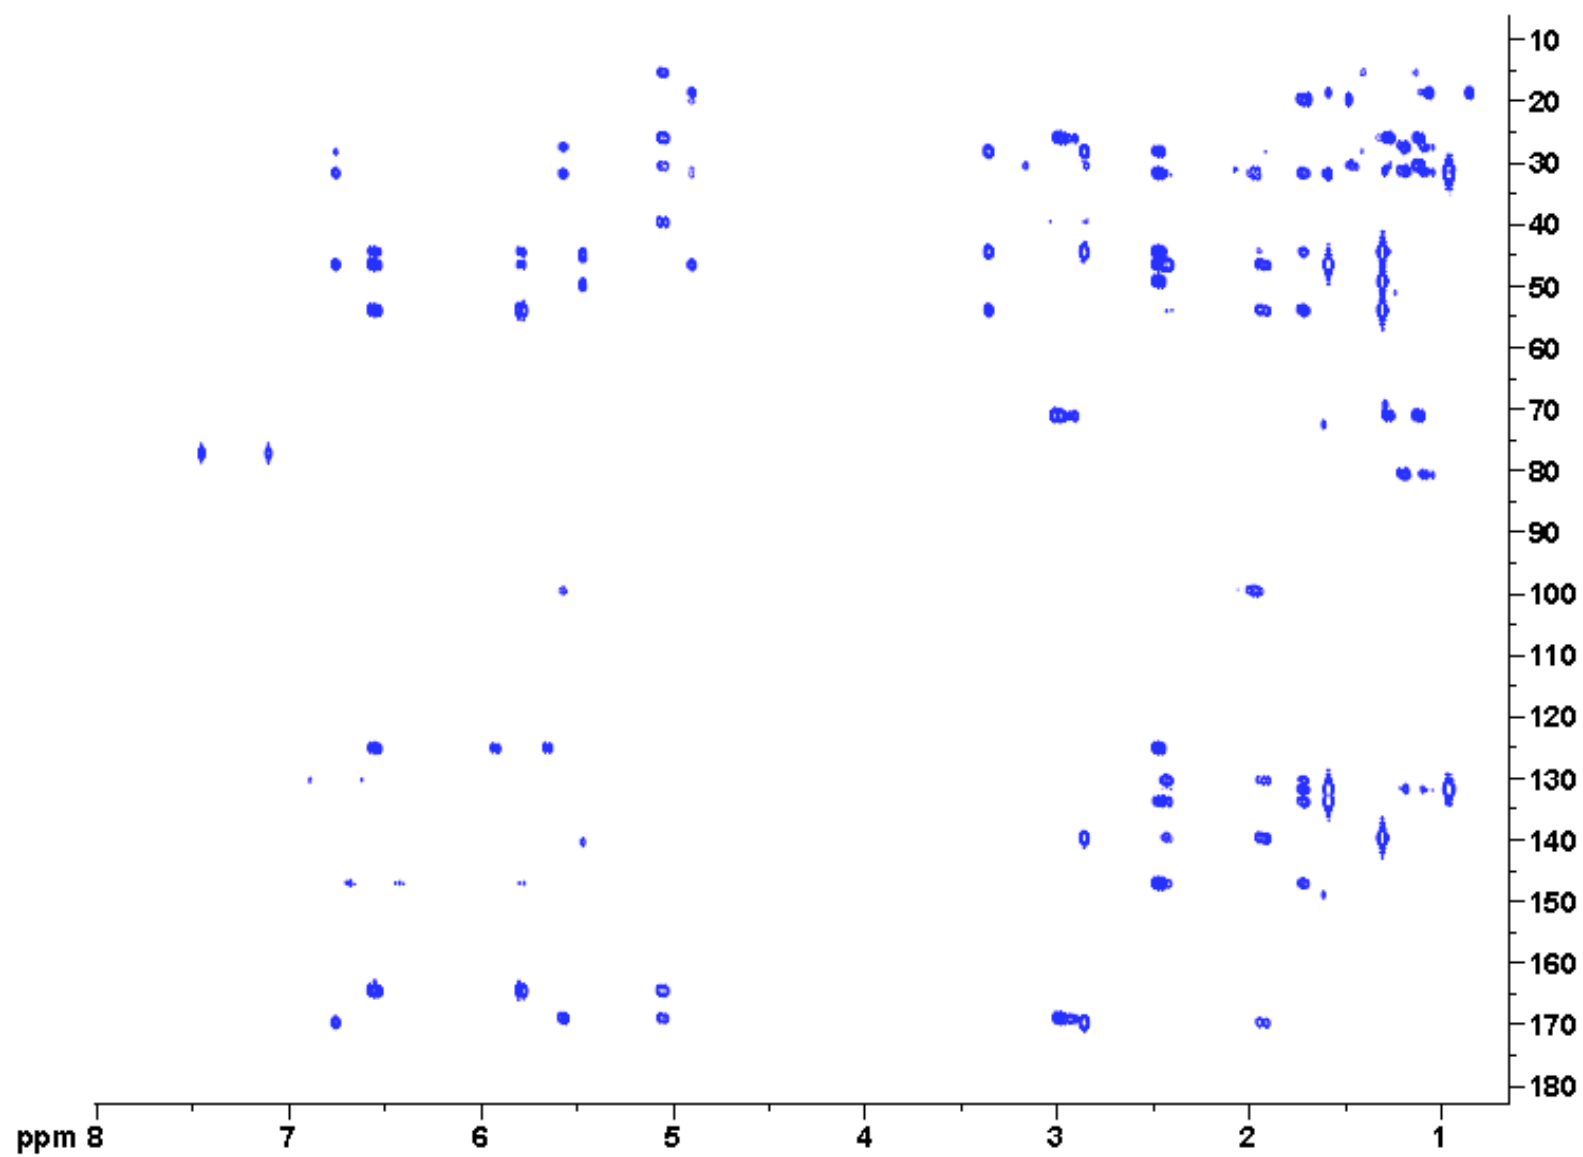

**Figure S11.** HMBC NMR spectrum of **1** (90  $\mu$ g, 152 nmole) (600 MHz,  $\text{CDCl}_3$ ). Optimized for  $^1J_{\text{CH}} = 6$  Hz.



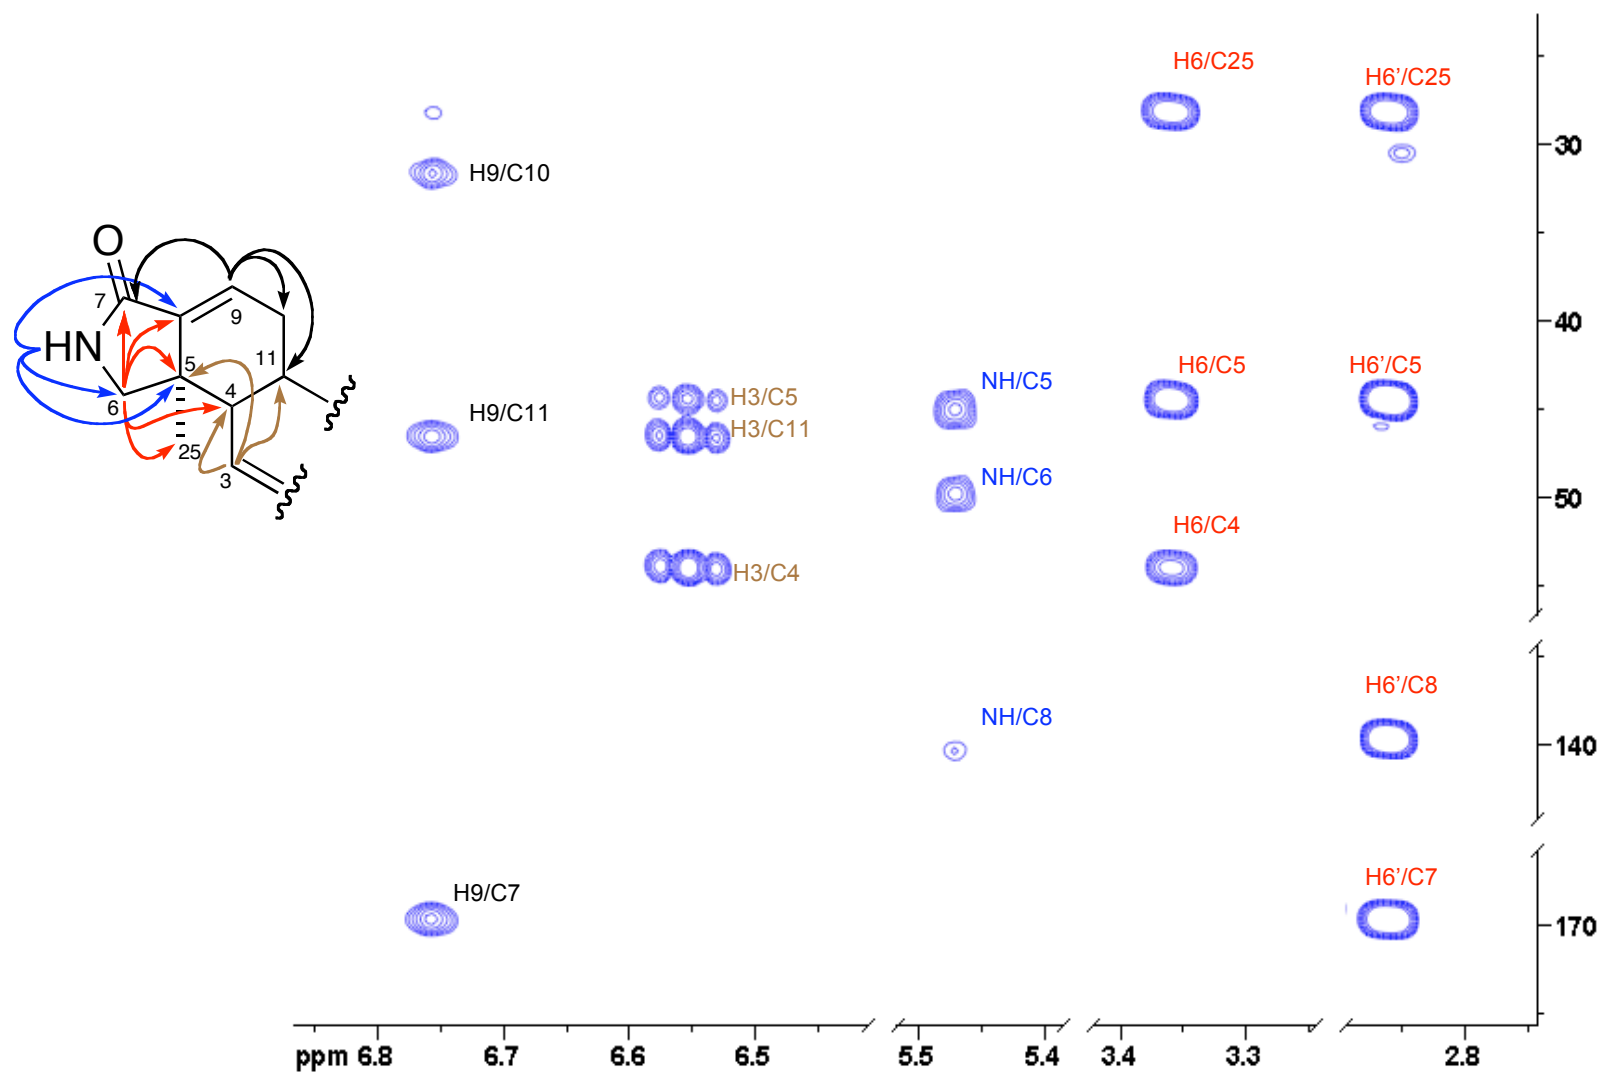

**Figure S12.** HMBC spectrum of **1** (600 MHz, CDCl<sub>3</sub>), expansion. Optimized for  $^1J_{\text{CH}} = 6$  Hz.

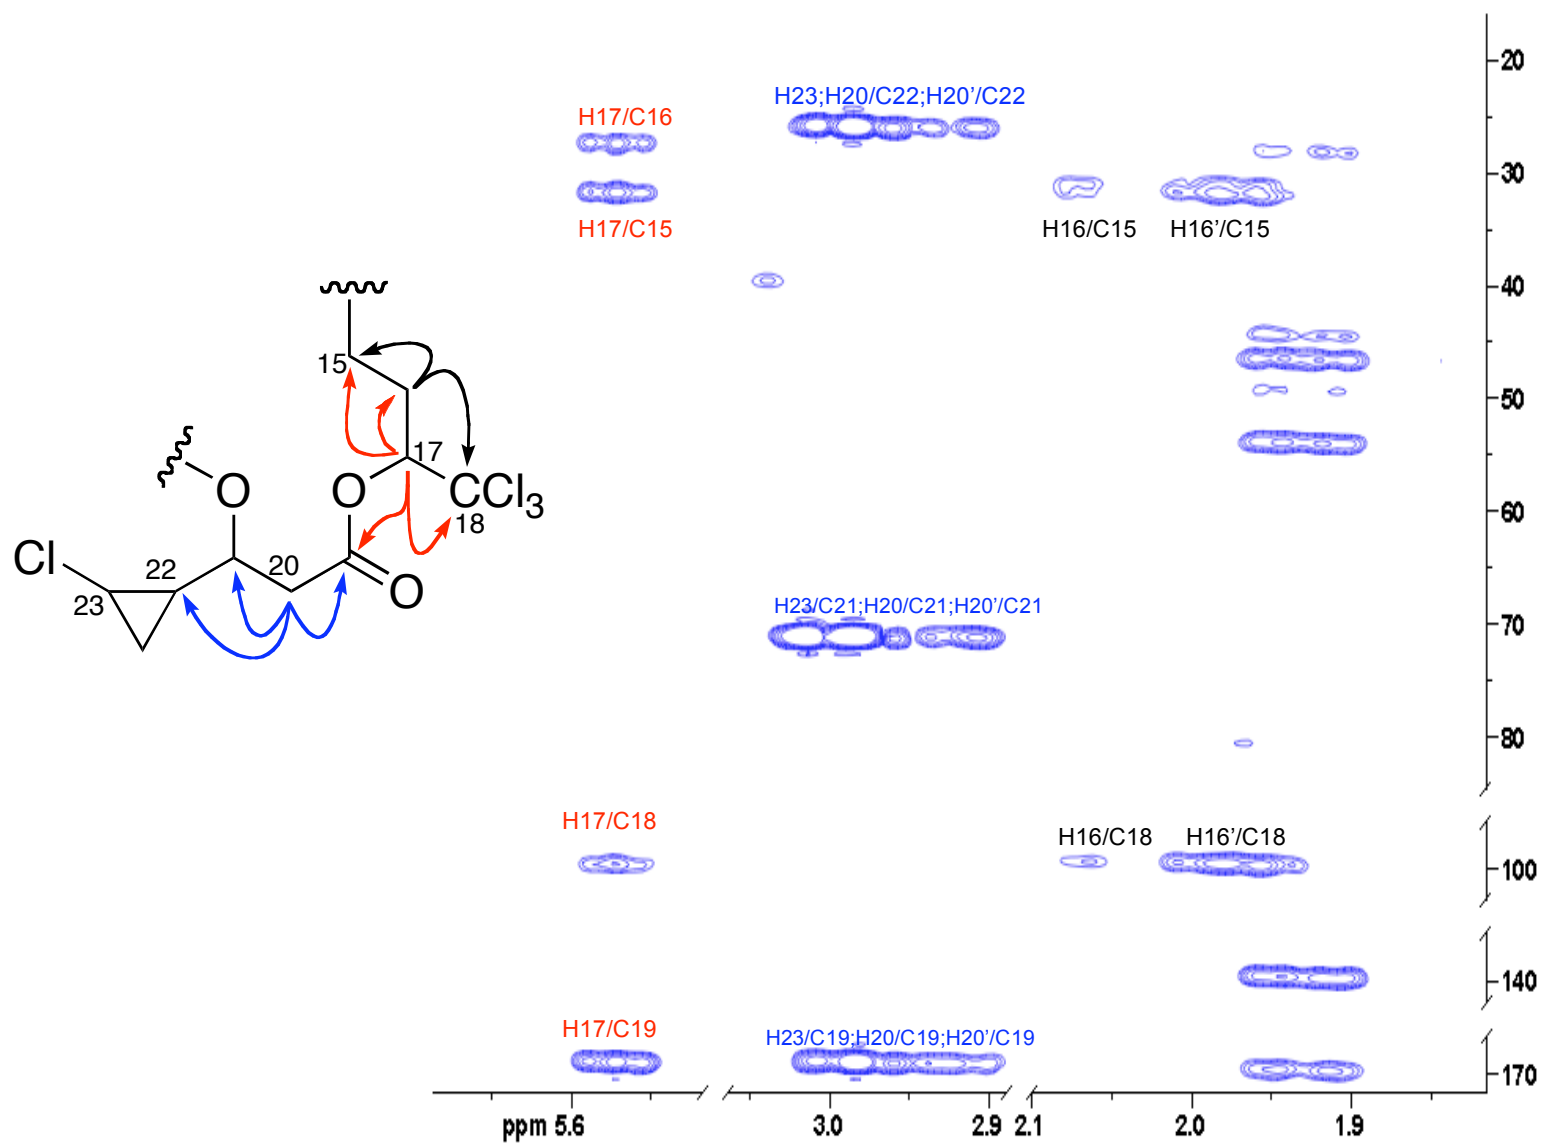

**Figure S13.** HMBC spectrum of **1** (600 MHz,  $\text{CDCl}_3$ , expansion. Optimized for  $^1J_{\text{CH}} = 6$  Hz.

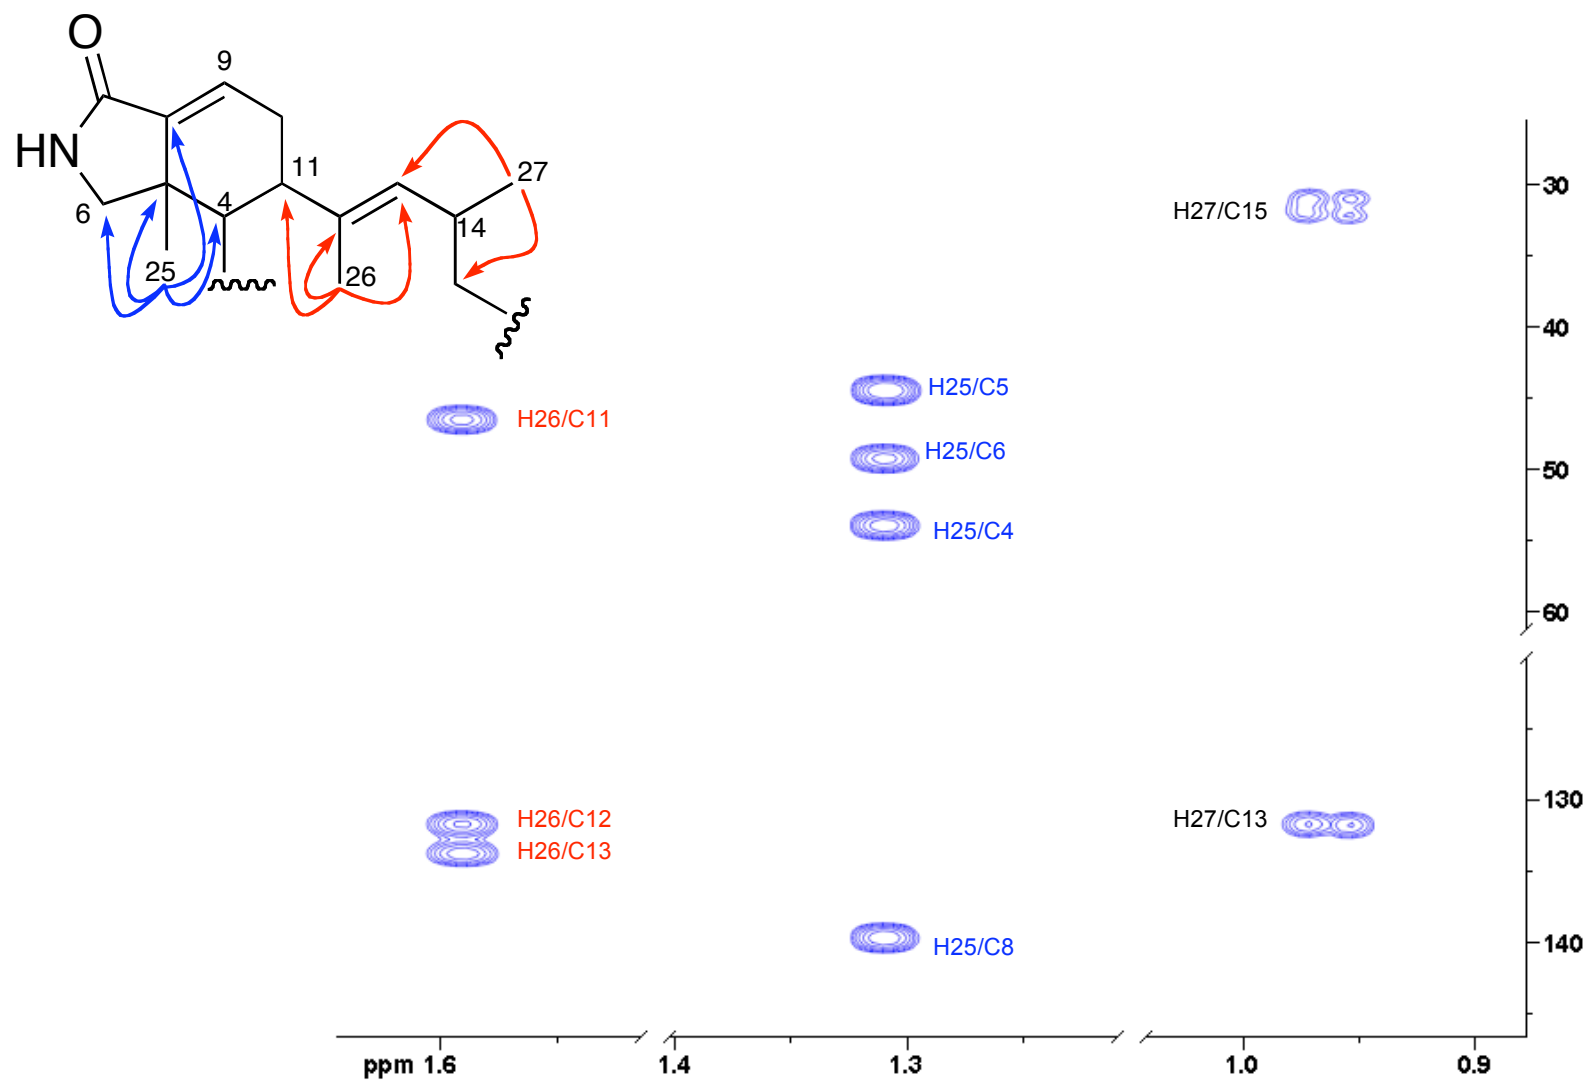

**Figure S14** HMBC NMR spectrum expansion of **1** (600 MHz, CDCl<sub>3</sub>). Optimized for  $^1J_{\text{CH}} = 6$  Hz.

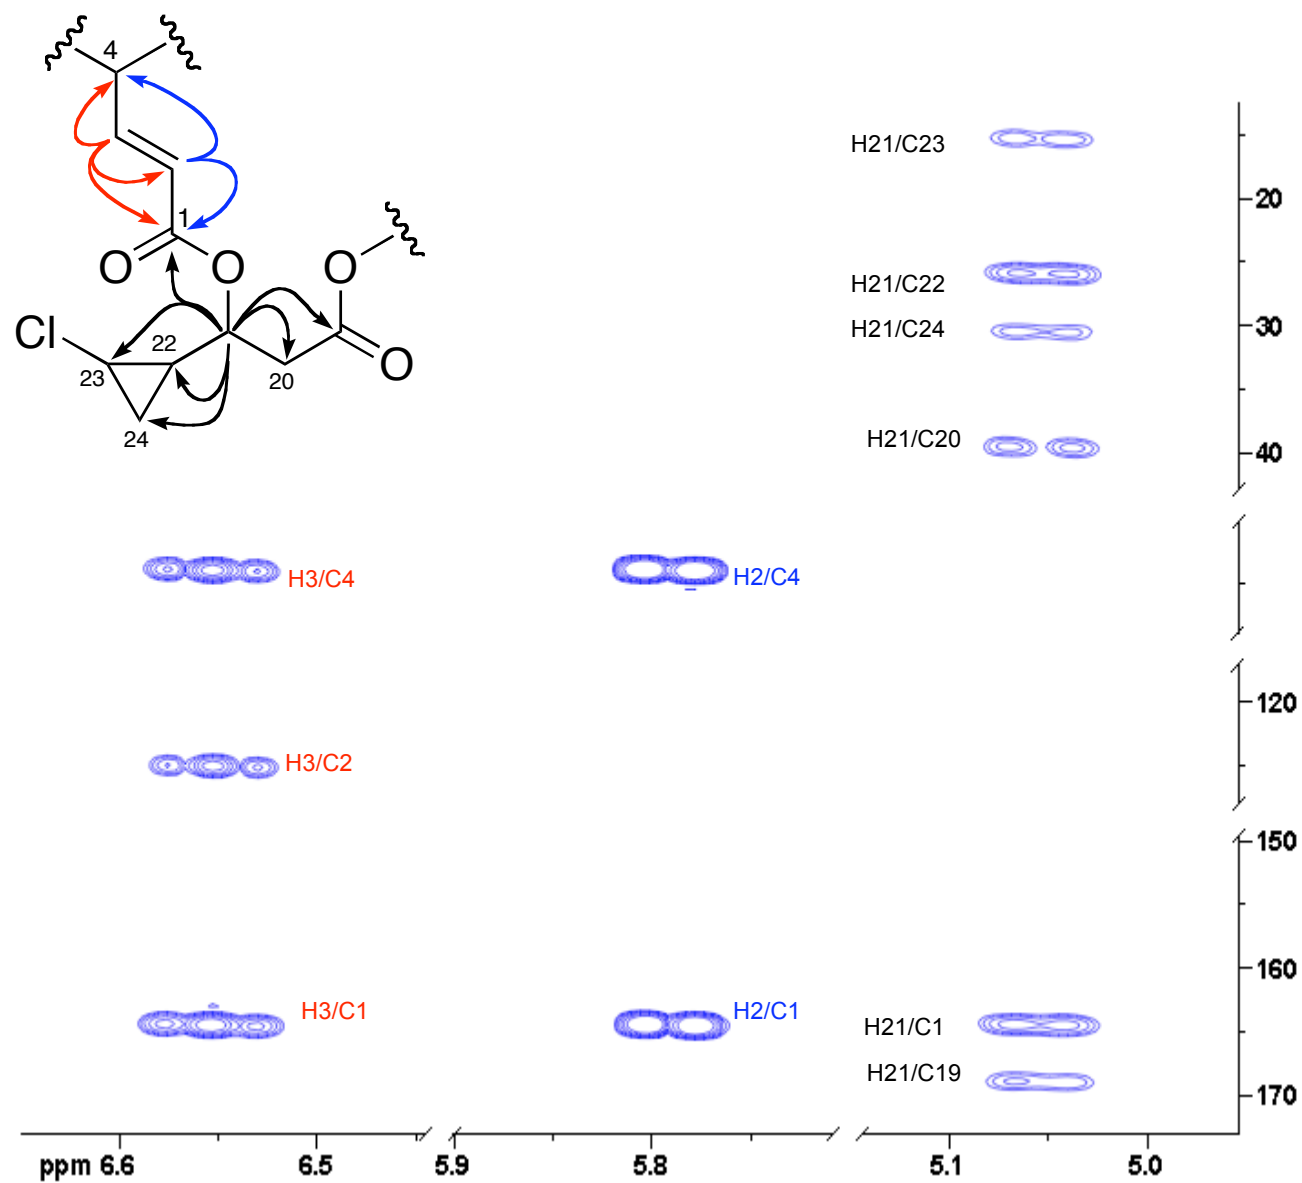

**Figure S15.** HMBC NMR spectrum expansion of **1** (600 MHz, CDCl<sub>3</sub>). Optimized for  $^1J_{\text{CH}} = 6$  Hz.

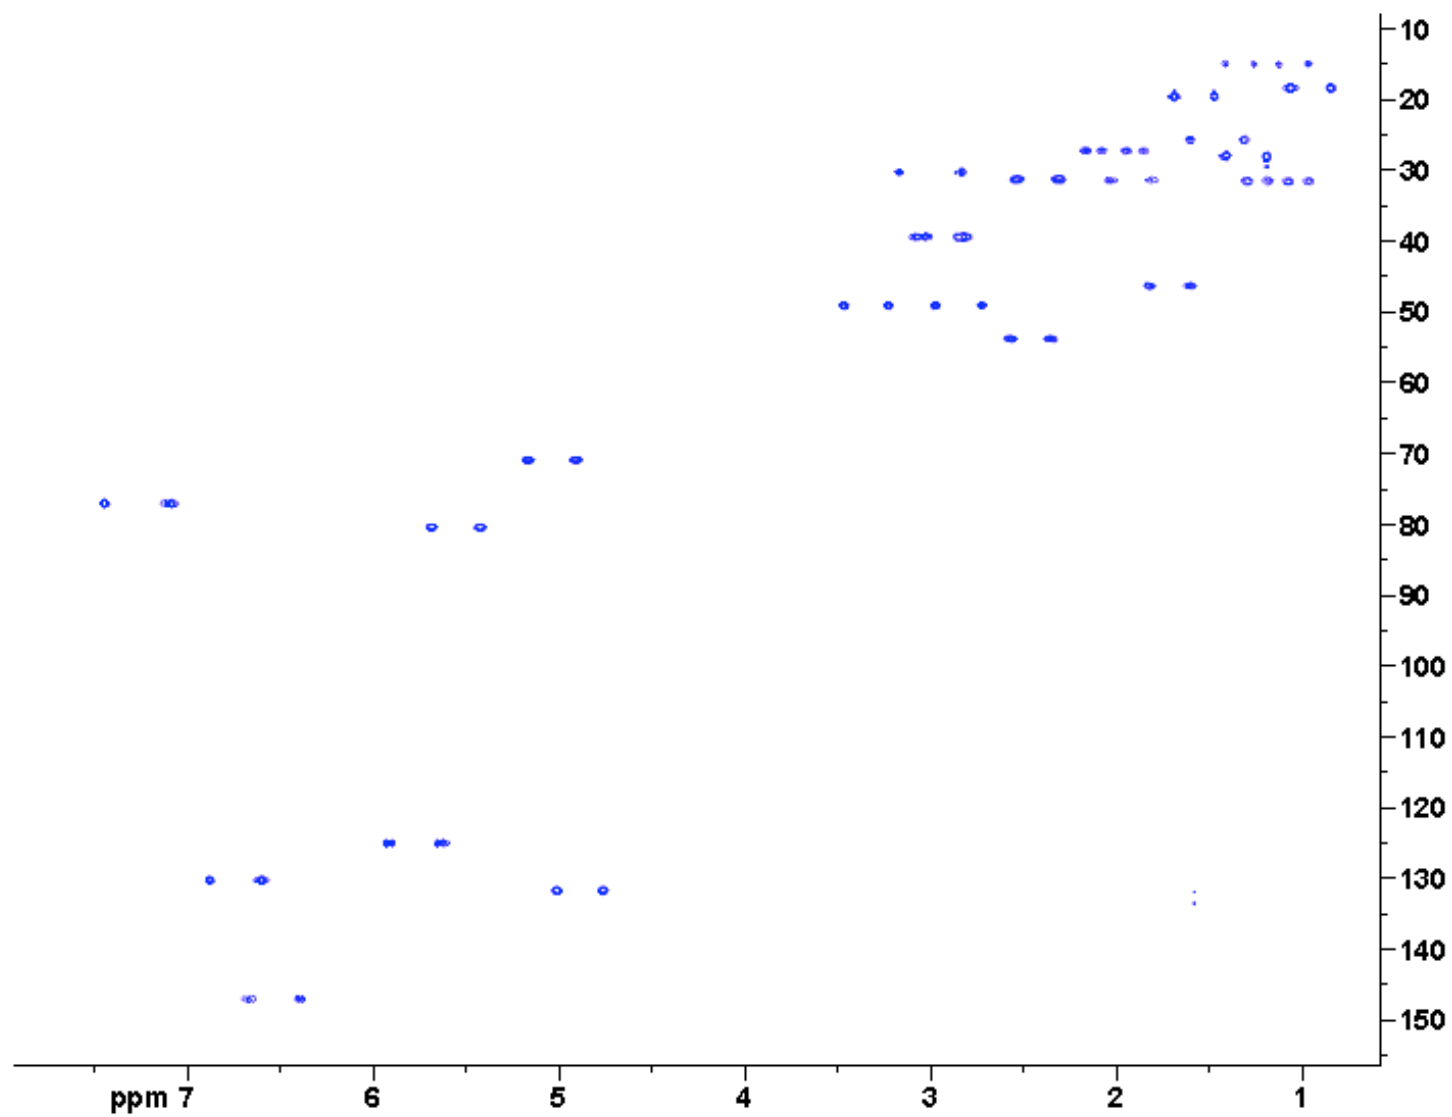

**Figure S16.**  $^1\text{H}$ -coupled HSQC spectrum of **1** (90  $\mu\text{g}$ , 152 nmole) (600 MHz,  $\text{CDCl}_3$ ). Optimized for  $^1J_{\text{CH}} = 190$  Hz.

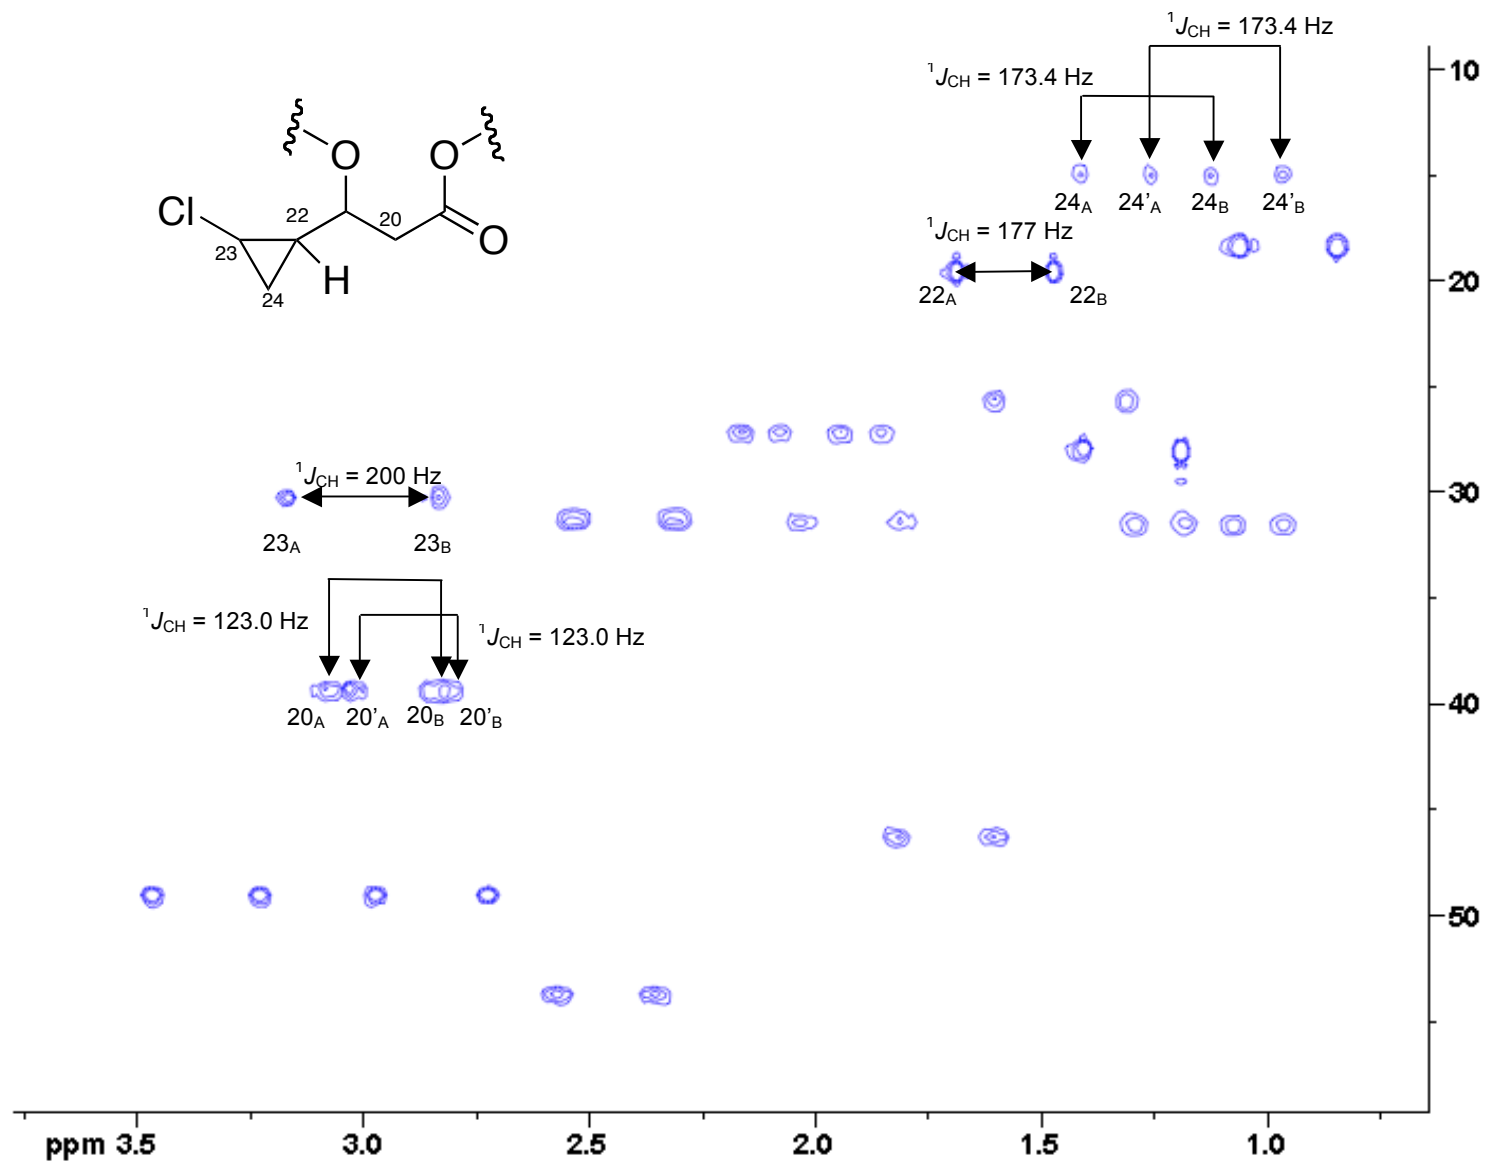

**Figure S17.**  $^1\text{H}$ -coupled HSQC spectrum of **1** (90  $\mu\text{g}$ , 152 nmole) (600 MHz,  $\text{CDCl}_3$ ), expansion. Optimized for  $^1J_{\text{CH}} = 190 \text{ Hz}$ .

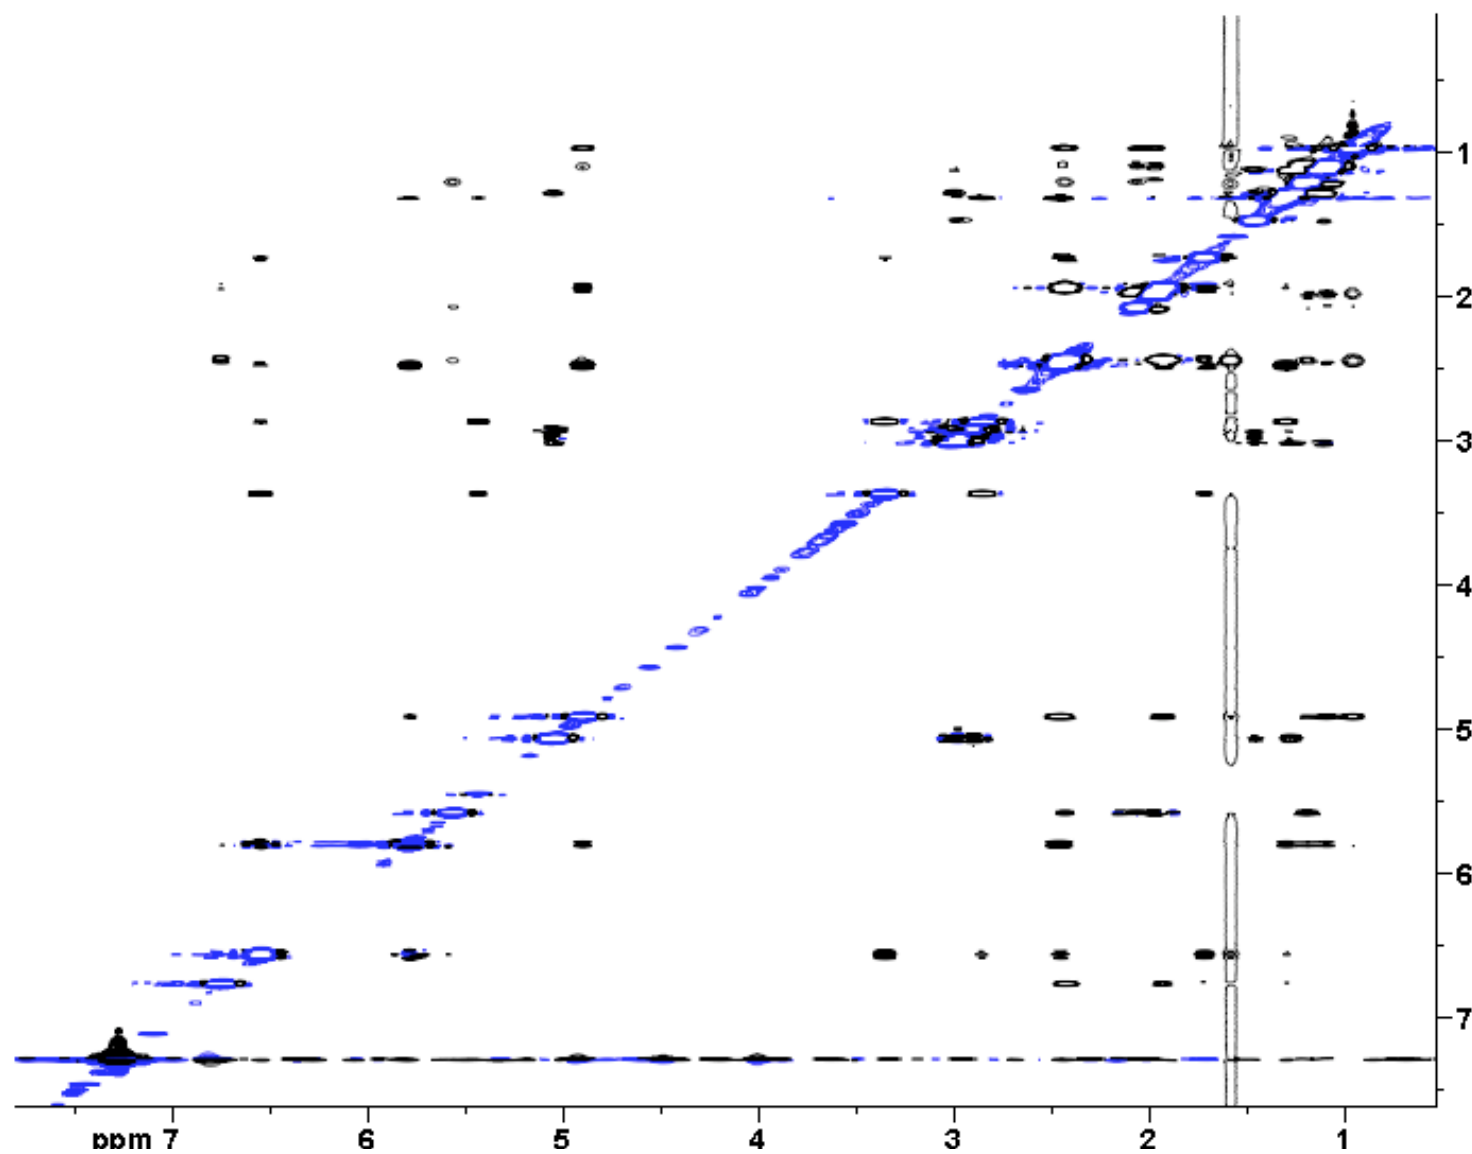

Figure S18. NOESY 1 (600 MHz, CDCl<sub>3</sub>).  $t_m = 400$  ms.

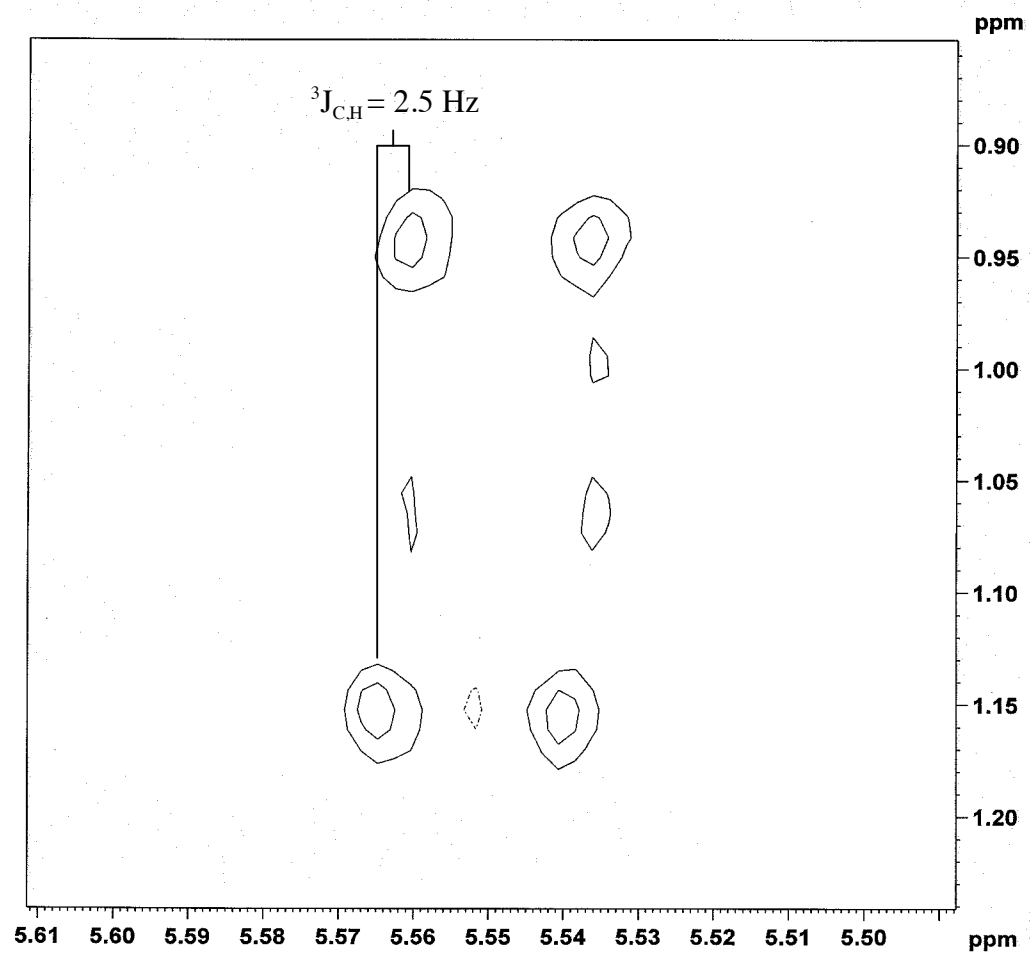

**Figure S19.** Expansion of HETLOC spectrum showing H17/H15 cross peak (600 MHz,  $\text{CDCl}_3$ ).



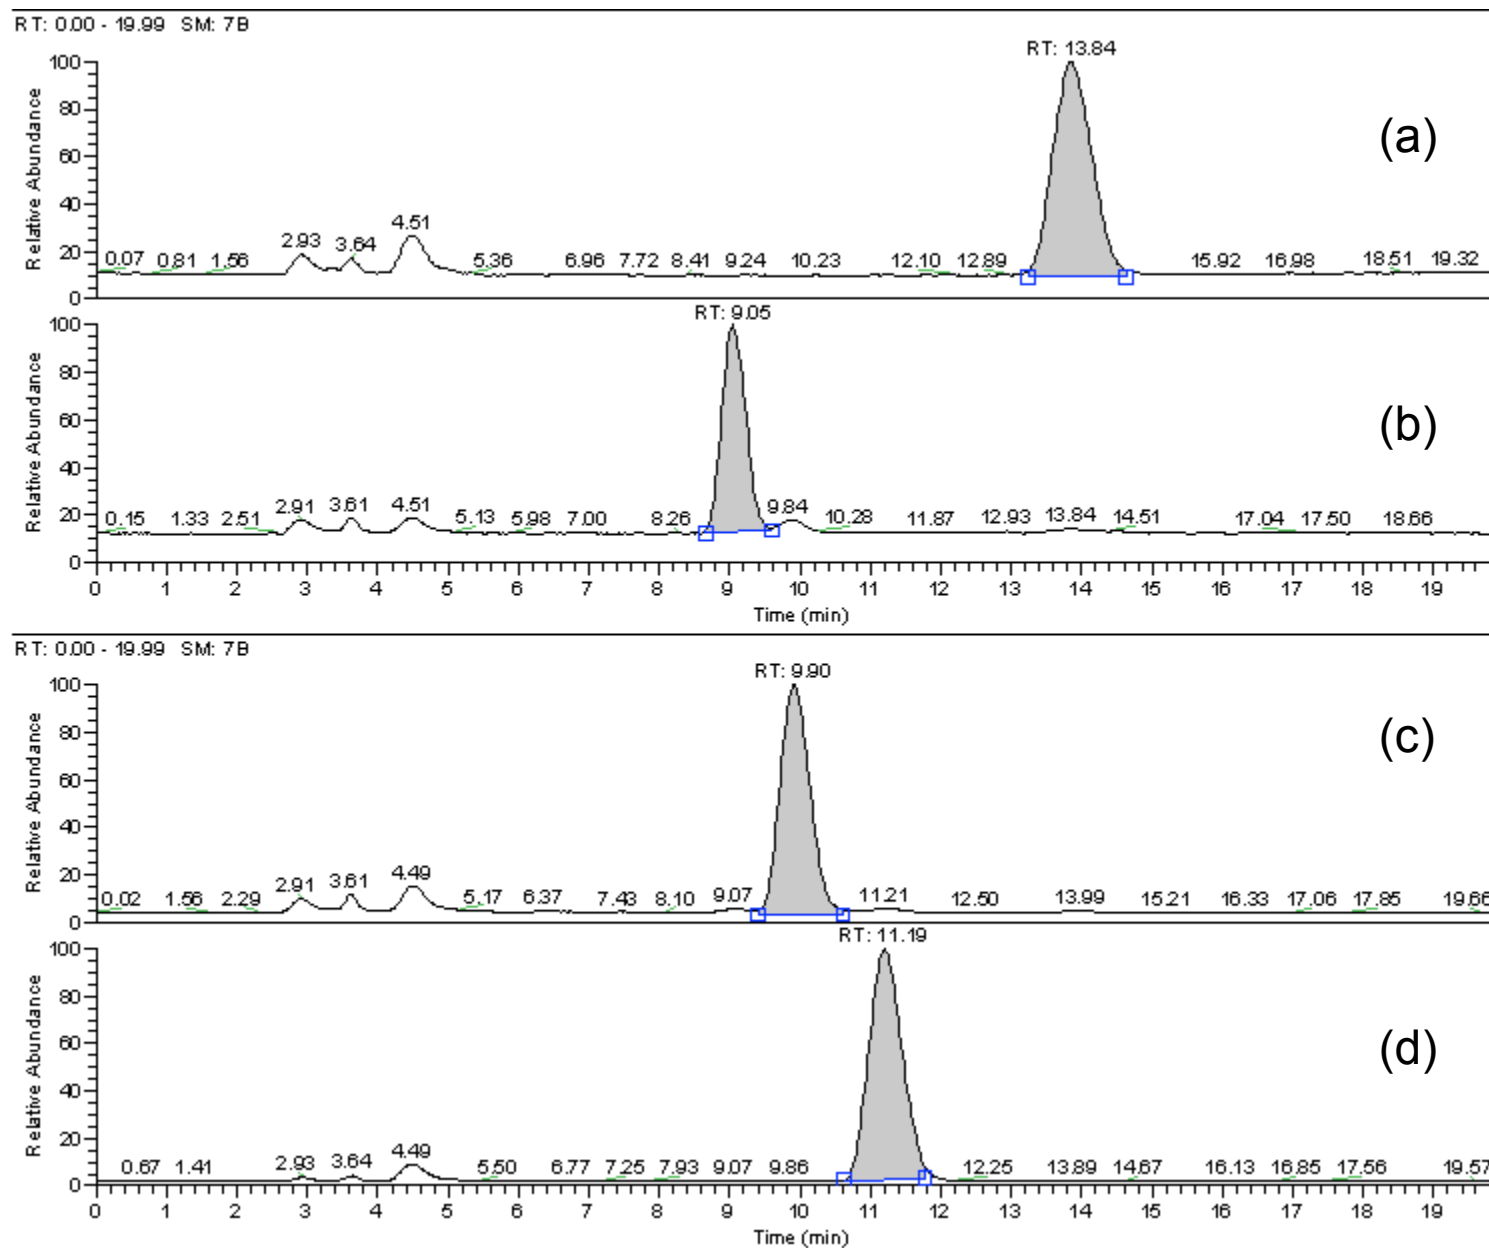

**Figure S20.** ESI LCMS chromatograms (single ion monitoring,  $m/z$  355.2,  $M+Na^+$ ). Chiralpak AD-RH (2.1 x 150 mm, 5  $\mu$ ; 1:4 HCOOH (aq. 0.1%)–CH<sub>3</sub>CN, 0.2 mL/min). (a) **7a** (b) **7c** (c) **7d** (d) **7b**.

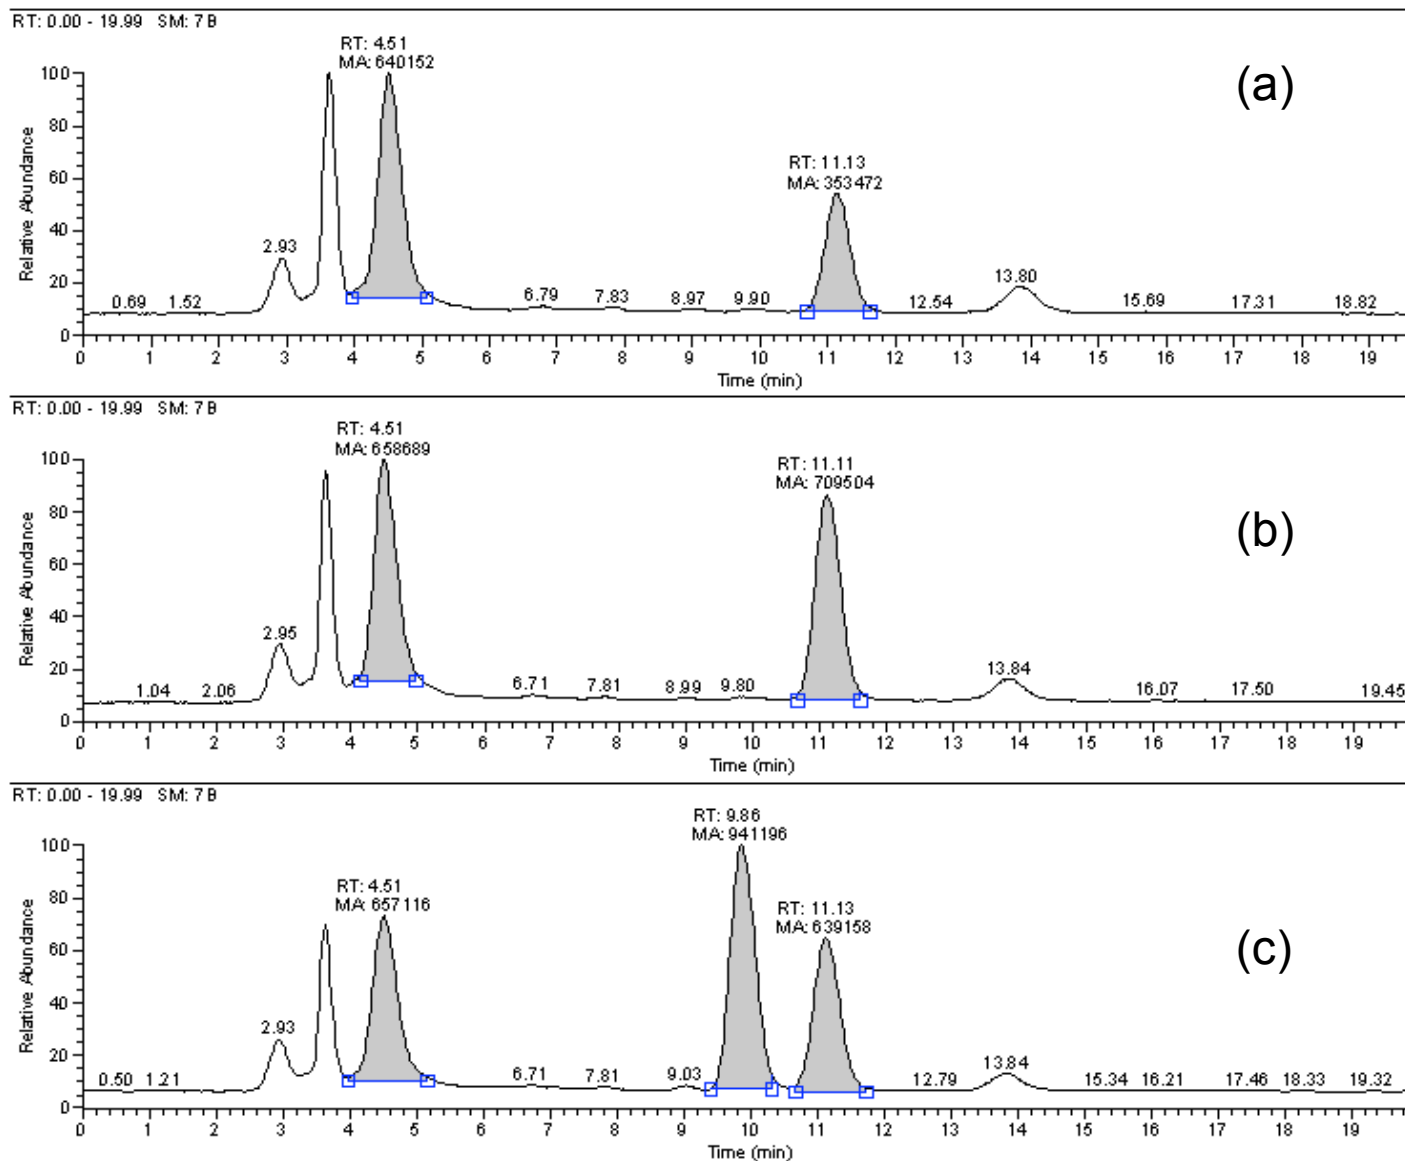

**Figure S21.** ESI LCMS chromatograms (single ion monitoring,  $m/z$  355.2,  $M+Na^+$ ). Chiralpak AD-RH (2.1 x 150 mm, 5  $\mu$ ; 1:4  $HCO_2H$  (0.1% aq.)– $CH_3CN$ , 0.2 mL/min). (a) 2-naphthone derivative of hydrolysate of **1** (see text). (b) co-injection of (a) and authentic (3*S*,4*S*,5*R*)-**7b**. (a). (c) co-injection of (a) + **7b** + **7d**.

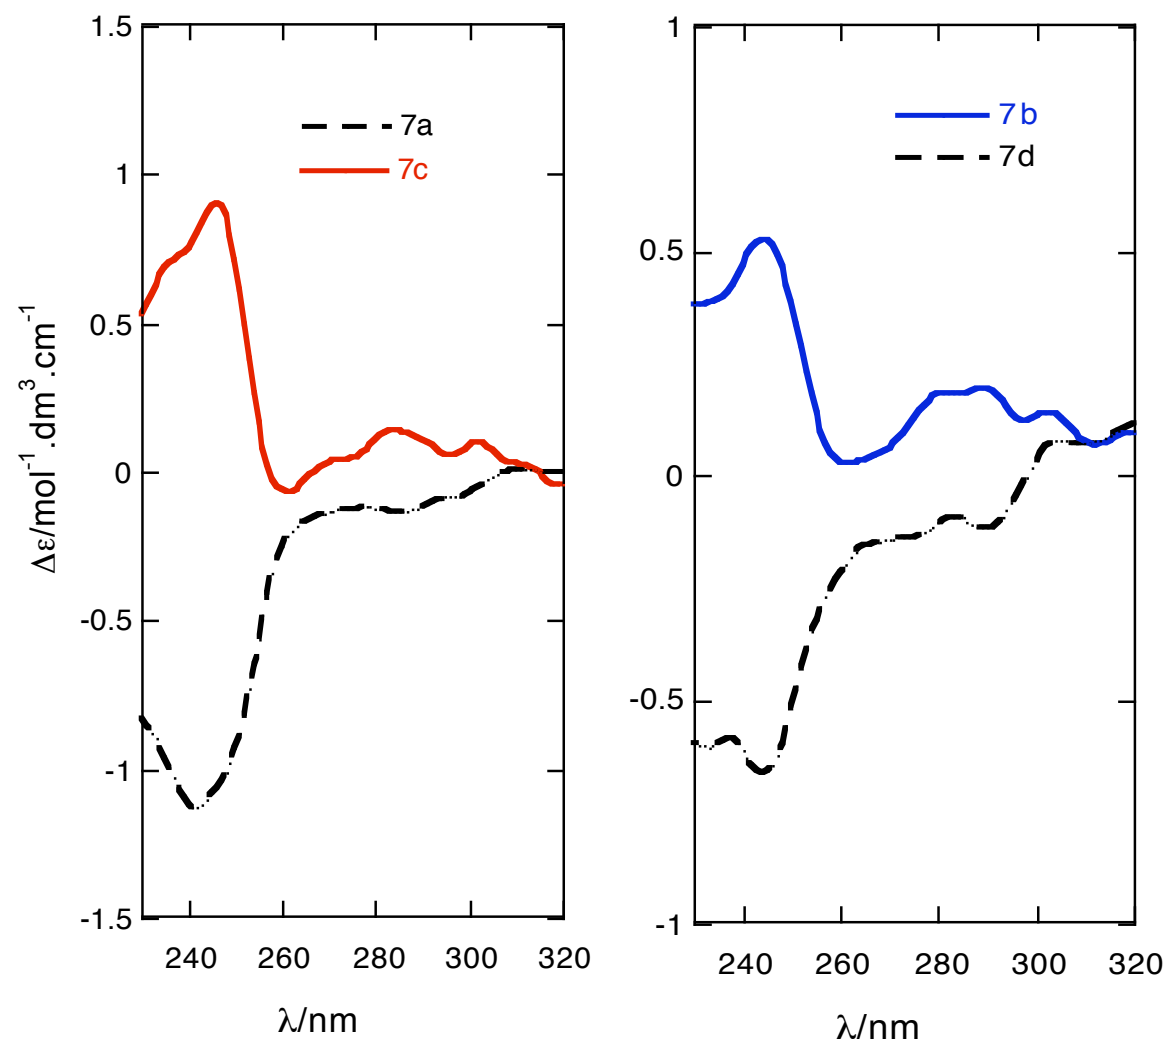

**Figure S22.** CD spectra of **7a-d** (3:7 *i*-PrOH:hexane). **7a**, conc.  $2.4 \times 10^{-4}$  M; **7c**, conc.  $1.28 \times 10^{-4}$  M; **7b**, conc.  $2.4 \times 10^{-4}$  M **7d**, conc.  $1.26 \times 10^{-4}$  M.

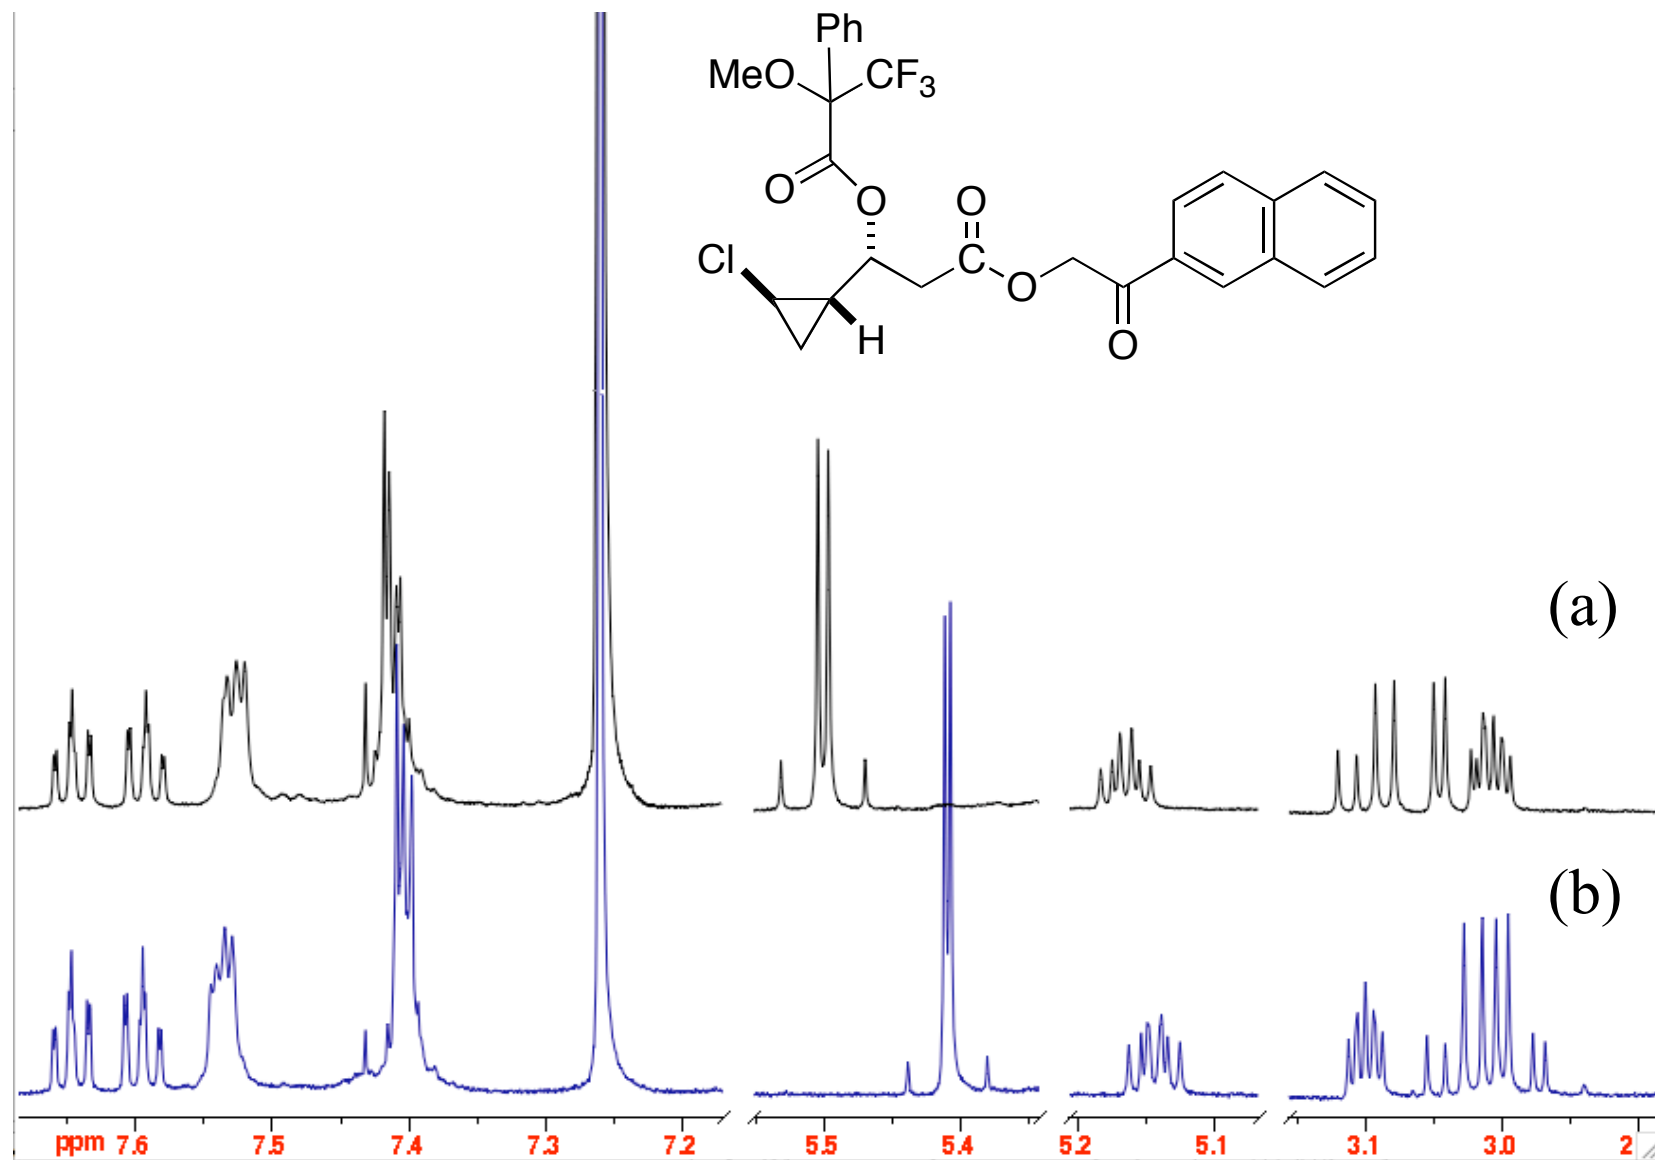

**Figure S23.** Expansion of <sup>1</sup>H NMR spectra of (a) (*S*)-MTPA and (b) (*R*)-MTPA esters of **7a**. (CDCl<sub>3</sub>, 600 MHz).
